# Supplementary material
Source: PubMed Central journal article supplement (PMC4696765)
Supplement: NIHMS743514-supplement-Suppl.pdf [file NIHMS743514-supplement-Suppl.pdf]

# Application of 3D NMR for Structure Determination of Peptide Natural Products

Fan Zhang,<sup>†</sup> Navid Adnani,<sup>†</sup> Emmanuel Vazquez-Rivera,<sup>‡</sup> Doug R. Braun,<sup>†</sup> Marco Tonelli,<sup>§</sup>  
David R. Andes,<sup>||</sup> and Tim S. Bugni<sup>\*,†</sup>

<sup>†</sup>*Pharmaceutical Sciences Division, University of Wisconsin–Madison, Madison, Wisconsin  
53705, United States*

<sup>‡</sup>*Molecular & Environmental Toxicology Center, University of Wisconsin–Madison, Madison,  
Wisconsin 53705, United States*

<sup>§</sup>*National Magnetic Resonance Facility at Madison, University of Wisconsin–Madison, Madison,  
Wisconsin 53706, United States*

<sup>||</sup>*Department of Medicine, University of Wisconsin–Madison, Madison, Wisconsin 53705, United  
States*

| <b>Contents</b>                                                                                                        | <b>Page</b> |
|------------------------------------------------------------------------------------------------------------------------|-------------|
| 1) <b>Figure S1.</b> <sup>1</sup> H NMR spectrum of eudistamide A ( <b>1</b> ; 500 MHz, DMSO- <i>d</i> <sub>6</sub> )  | 4           |
| 2) <b>Figure S2.</b> <sup>13</sup> C NMR spectrum of eudistamide A ( <b>1</b> ; 125 MHz, DMSO- <i>d</i> <sub>6</sub> ) | 5           |
| 3) <b>Figure S3.</b> gCOSY spectrum of eudistamide A ( <b>1</b> ; 500 MHz, DMSO- <i>d</i> <sub>6</sub> )               | 6           |
| 4) <b>Figure S4.</b> gHSQC spectrum of eudistamide A ( <b>1</b> ; 500 MHz, DMSO- <i>d</i> <sub>6</sub> )               | 7           |
| 5) <b>Figure S5.</b> gHMBC spectrum of eudistamide A ( <b>1</b> ; 500 MHz, DMSO- <i>d</i> <sub>6</sub> )               | 8           |

|                                                                                                                                         |    |
|-----------------------------------------------------------------------------------------------------------------------------------------|----|
| 6) <b>Figure S6.</b> ROESY spectrum of eudistamide A ( <b>1</b> ; 500 MHz, DMSO- <i>d</i> <sub>6</sub> )                                | 9  |
| 7) <b>Figure S7.</b> HRESIMS of eudistamide A ( <b>1</b> )                                                                              | 10 |
| 8) <b>Figure S8.</b> NHCA spectrum of <sup>13</sup> C, <sup>15</sup> N-labeled <b>1</b> (800 MHz, DMSO- <i>d</i> <sub>6</sub> )         | 11 |
| 9) <b>Figure S9.</b> NH(CO)CA spectrum of <sup>13</sup> C, <sup>15</sup> N-labeled <b>1</b> (800 MHz, DMSO- <i>d</i> <sub>6</sub> )     | 12 |
| 10) <b>Figure S10.</b> CBCANH spectrum of <sup>13</sup> C, <sup>15</sup> N-labeled <b>1</b> (800 MHz, DMSO- <i>d</i> <sub>6</sub> )     | 13 |
| 11) <b>Figure S11.</b> CBCA(CO)NH spectrum of <sup>13</sup> C, <sup>15</sup> N-labeled <b>1</b> (800 MHz, DMSO- <i>d</i> <sub>6</sub> ) | 14 |
| 12) <b>Figure S12.</b> NHCO spectrum of <sup>13</sup> C, <sup>15</sup> N-labeled <b>1</b> (800 MHz, DMSO- <i>d</i> <sub>6</sub> )       | 15 |
| 13) <b>Figure S13.</b> NH(CA)CO spectrum of <sup>13</sup> C, <sup>15</sup> N-labeled <b>1</b> (800 MHz, DMSO- <i>d</i> <sub>6</sub> )   | 16 |
| 14) <b>Figure S14.</b> HCCH-TOCSY spectrum of <sup>13</sup> C, <sup>15</sup> N-labeled <b>1</b> (800 MHz, DMSO- <i>d</i> <sub>6</sub> ) | 17 |
| 15) <b>Figure S15.</b> <sup>1</sup> H NMR spectrum of eudistamide B ( <b>2</b> ; 500 MHz, DMSO- <i>d</i> <sub>6</sub> )                 | 18 |
| 16) <b>Figure S16.</b> <sup>1</sup> H NMR spectrum of eudistamide B ( <b>2</b> ; 500 MHz, MeOD- <i>d</i> <sub>3</sub> )                 | 19 |
| 17) <b>Figure S17.</b> <sup>13</sup> C NMR spectrum of eudistamide B ( <b>2</b> ; 125 MHz, DMSO- <i>d</i> <sub>6</sub> )                | 20 |
| 18) <b>Figure S18.</b> gCOSY spectrum of eudistamide B ( <b>2</b> ; 500 MHz, DMSO- <i>d</i> <sub>6</sub> )                              | 21 |
| 19) <b>Figure S19.</b> gHSQC spectrum of eudistamide B ( <b>2</b> ; 500 MHz, DMSO- <i>d</i> <sub>6</sub> )                              | 22 |
| 20) <b>Figure S20.</b> gHMBC spectrum of eudistamide B ( <b>2</b> ; 500 MHz, DMSO- <i>d</i> <sub>6</sub> )                              | 23 |
| 21) <b>Figure S21.</b> ROESY spectrum of eudistamide B ( <b>2</b> ; 500 MHz, DMSO- <i>d</i> <sub>6</sub> )                              | 24 |
| 22) <b>Figure S22.</b> HRESIMS of eudistamide B ( <b>2</b> )                                                                            | 25 |
| 23) <b>Figure S23.</b> MS/MS spectrum of eudistamide B ( <b>2</b> )                                                                     | 26 |
| 24) <b>Figure S24.</b> NHCA spectrum of <sup>13</sup> C, <sup>15</sup> N-labeled <b>2</b> (800 MHz, DMSO- <i>d</i> <sub>6</sub> )       | 27 |
| 25) <b>Figure S25.</b> NH(CO)CA spectrum of <sup>13</sup> C, <sup>15</sup> N-labeled <b>2</b> (800 MHz, DMSO- <i>d</i> <sub>6</sub> )   | 28 |
| 26) <b>Figure S26.</b> CBCANH spectrum of <sup>13</sup> C, <sup>15</sup> N-labeled <b>2</b> (800 MHz, DMSO- <i>d</i> <sub>6</sub> )     | 29 |
| 27) <b>Figure S27.</b> CBCA(CO)NH spectrum of <sup>13</sup> C, <sup>15</sup> N-labeled <b>2</b> (800 MHz, DMSO- <i>d</i> <sub>6</sub> ) | 30 |
| 28) <b>Figure S28.</b> NHCO spectrum of <sup>13</sup> C, <sup>15</sup> N-labeled <b>2</b> (800 MHz, DMSO- <i>d</i> <sub>6</sub> )       | 31 |

|                                                                                                                           |    |
|---------------------------------------------------------------------------------------------------------------------------|----|
| 29) <b>Figure S29.</b> NH(CA)CO spectrum of $^{13}\text{C}$ , $^{15}\text{N}$ -labeled <b>2</b> (800 MHz, DMSO- $d_6$ )   | 32 |
| 30) <b>Figure S30.</b> HCCH-TOCSY spectrum of $^{13}\text{C}$ , $^{15}\text{N}$ -labeled <b>2</b> (800 MHz, DMSO- $d_6$ ) | 33 |
| 31) <b>Table S1.</b> 3D NMR data for eudistamide A ( <b>1</b> ; 800 MHz, DMSO- $d_6$ )                                    | 34 |
| 32) <b>Table S2.</b> 3D NMR data for eudistamide B ( <b>2</b> ; 800 MHz, DMSO- $d_6$ )                                    | 37 |
| 33) <b>Table S3.</b> $^1\text{H}$ and $^{13}\text{C}$ NMR data for compound <b>1</b>                                      | 40 |
| 34) <b>Table S4.</b> $^1\text{H}$ and $^{13}\text{C}$ NMR data for compound <b>2</b>                                      | 42 |
| 35) <b>Table S5.</b> Advanced Marfey's analysis of eudistamide A ( <b>1</b> )                                             | 45 |
| 36) <b>Table S6.</b> Advanced Marfey's analysis of eudistamide B ( <b>2</b> )                                             | 46 |
| 37) Media study of strain WMMB 705                                                                                        | 47 |

---

\* To whom correspondence should be addressed. Tel.: 1-608-263-2519. E-mail:

tim.bugni@wisc.edu.

**Figure S1.**  $^1\text{H}$  NMR Spectrum of Eudistamide A (**1**; 500 MHz,  $\text{DMSO-}d_6$ ).

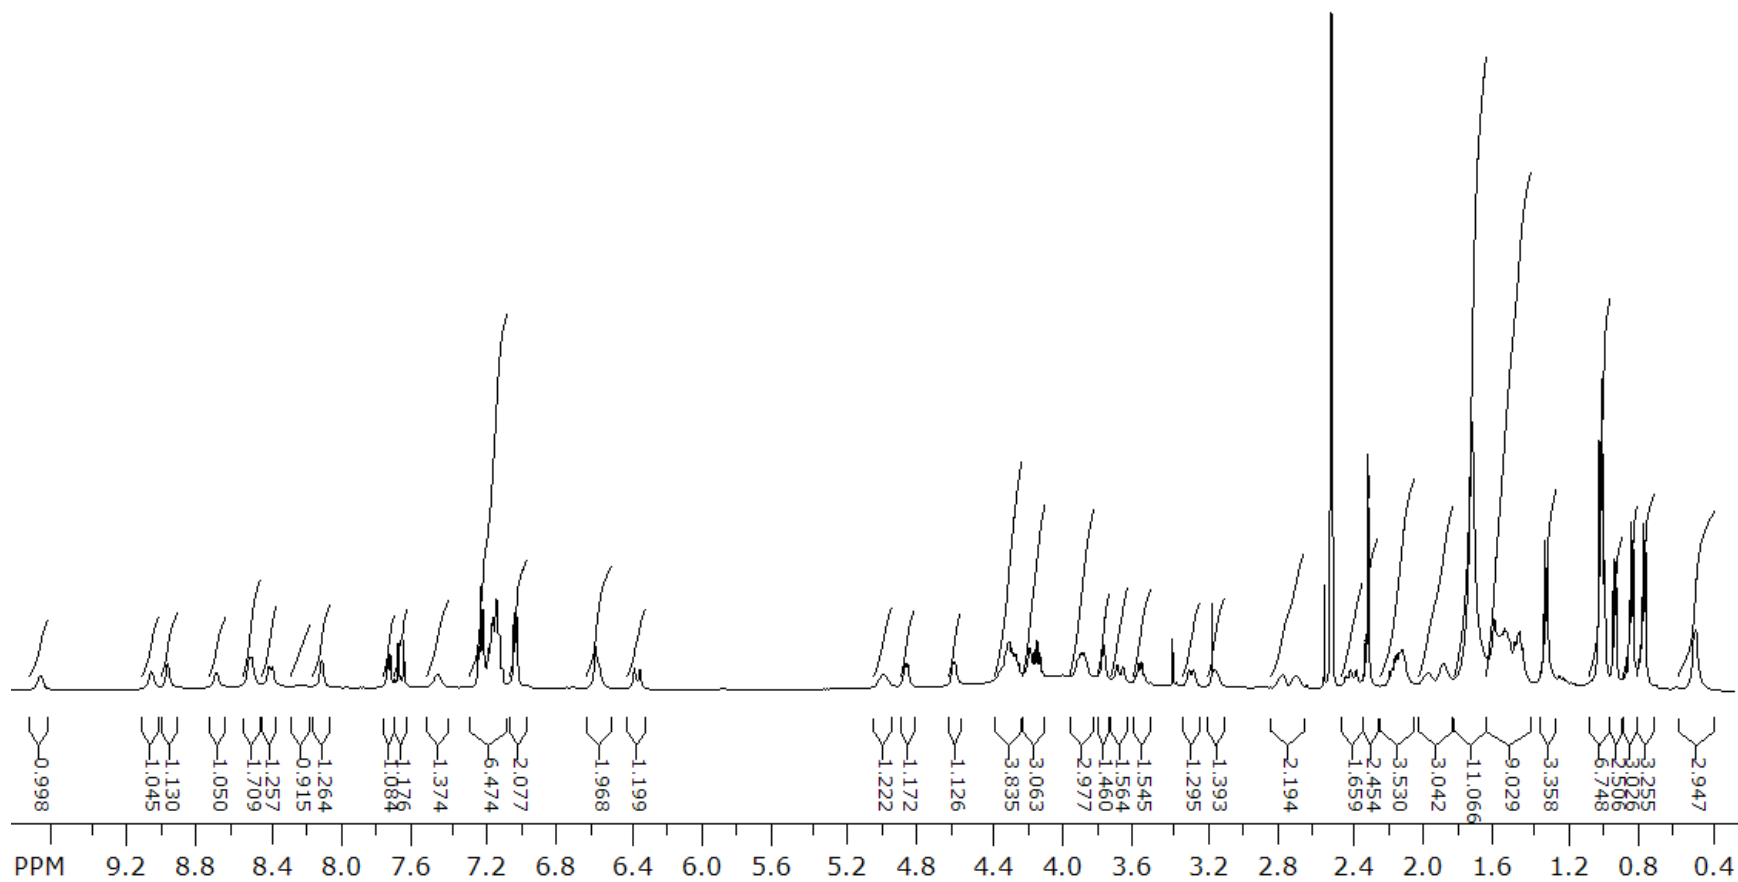

**Figure S2.**  $^{13}\text{C}$  NMR Spectrum of Eudistamide A (**1**; 125 MHz,  $\text{DMSO-}d_6$ ).

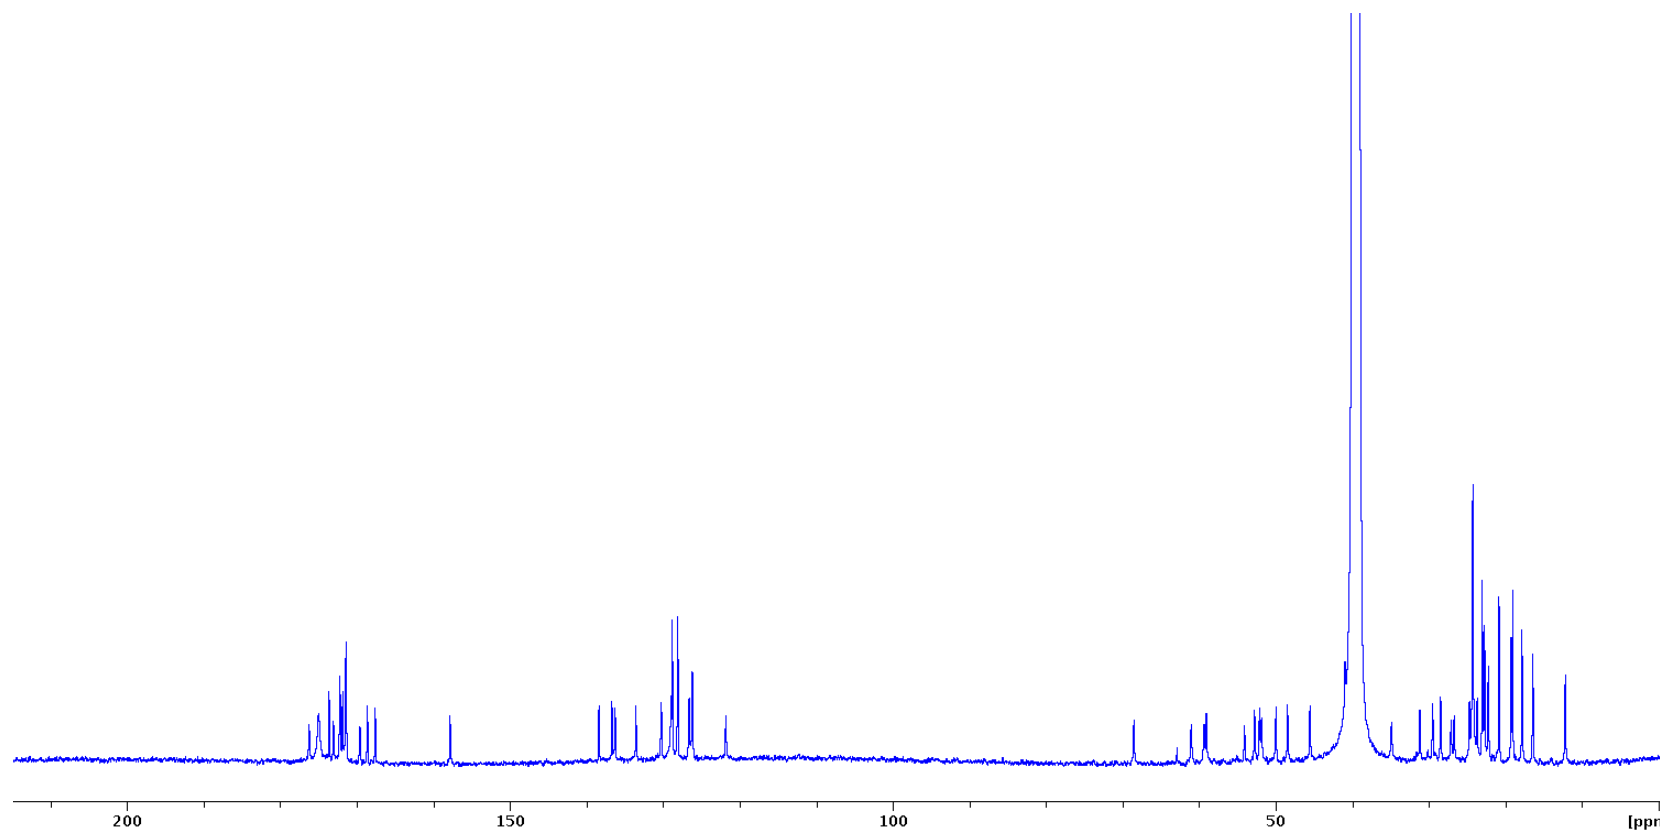

**Figure S3.** gCOSY Spectrum of Eudistamide A (**1**; 500 MHz, DMSO-*d*<sub>6</sub>).

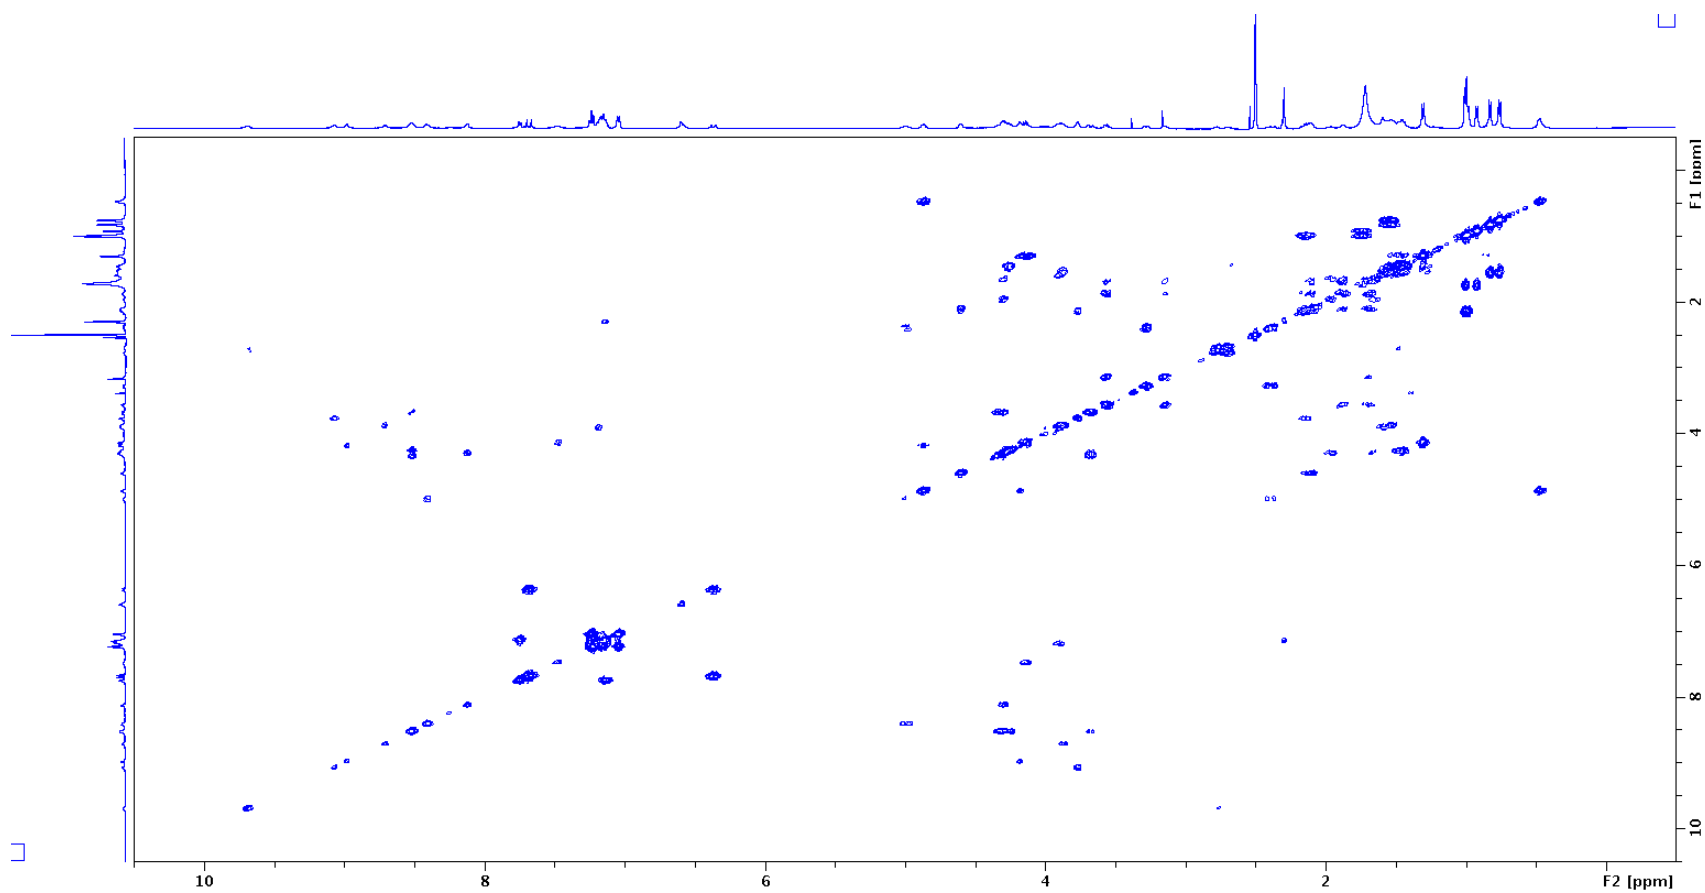

**Figure S4.** gHSQC Spectrum of Eudistamide A (**1**; 500 MHz, DMSO-*d*<sub>6</sub>).

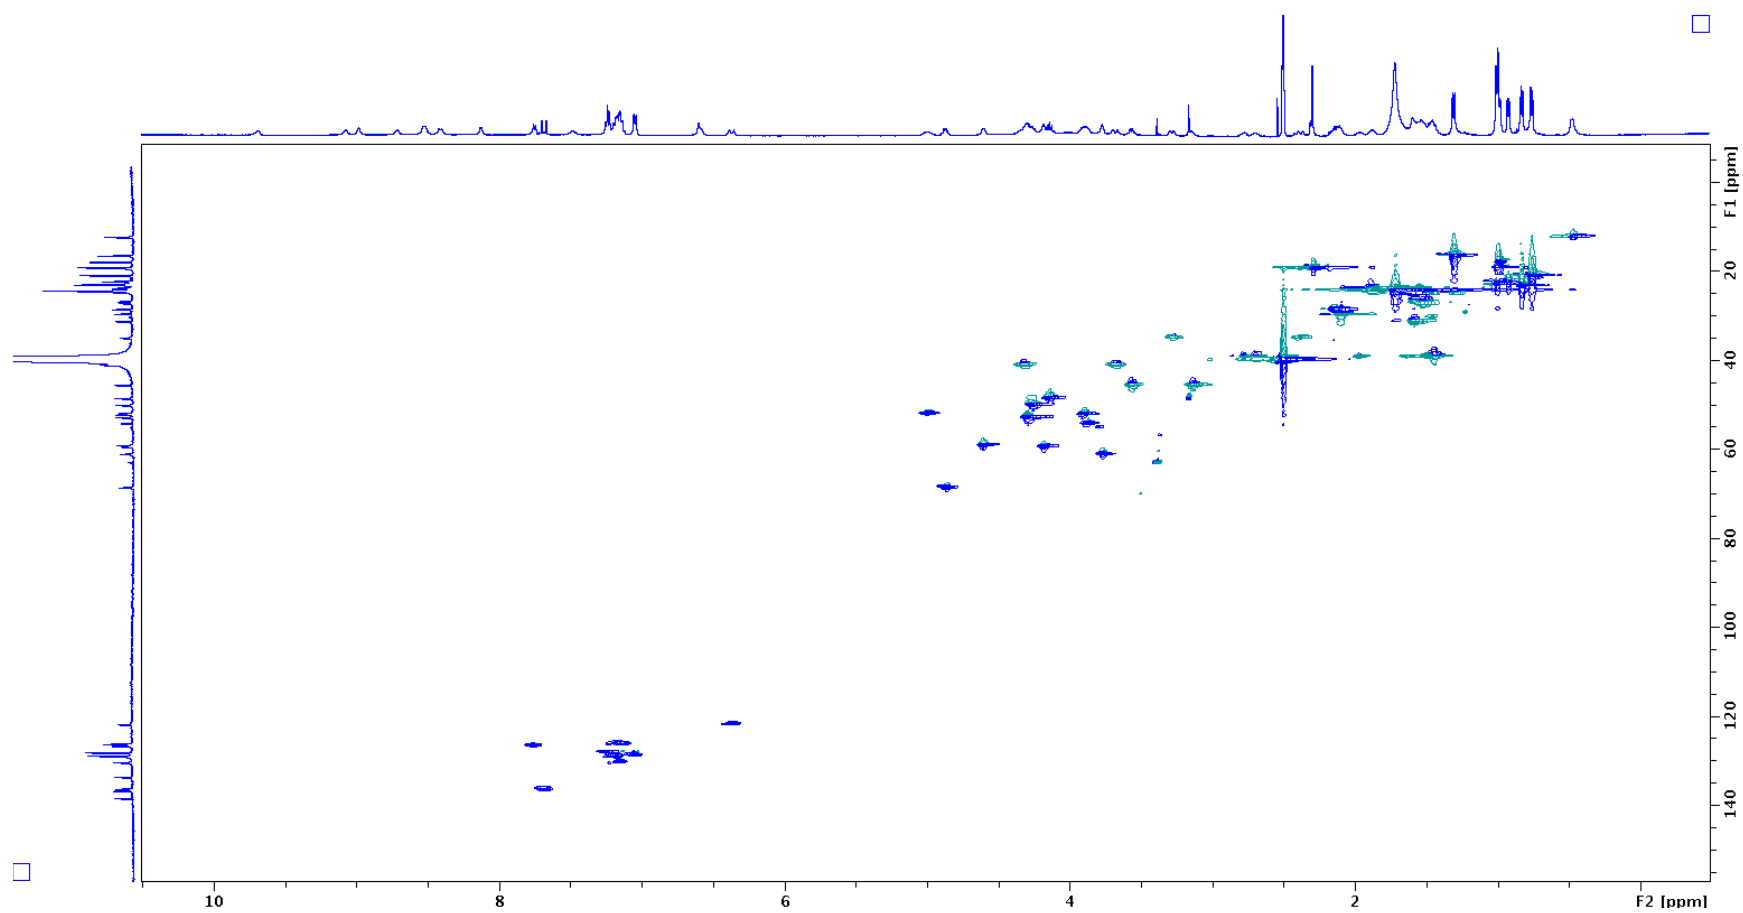

**Figure S5.** gHMBC Spectrum of Eudistamide A (**1**; 500 MHz, DMSO- $d_6$ ).

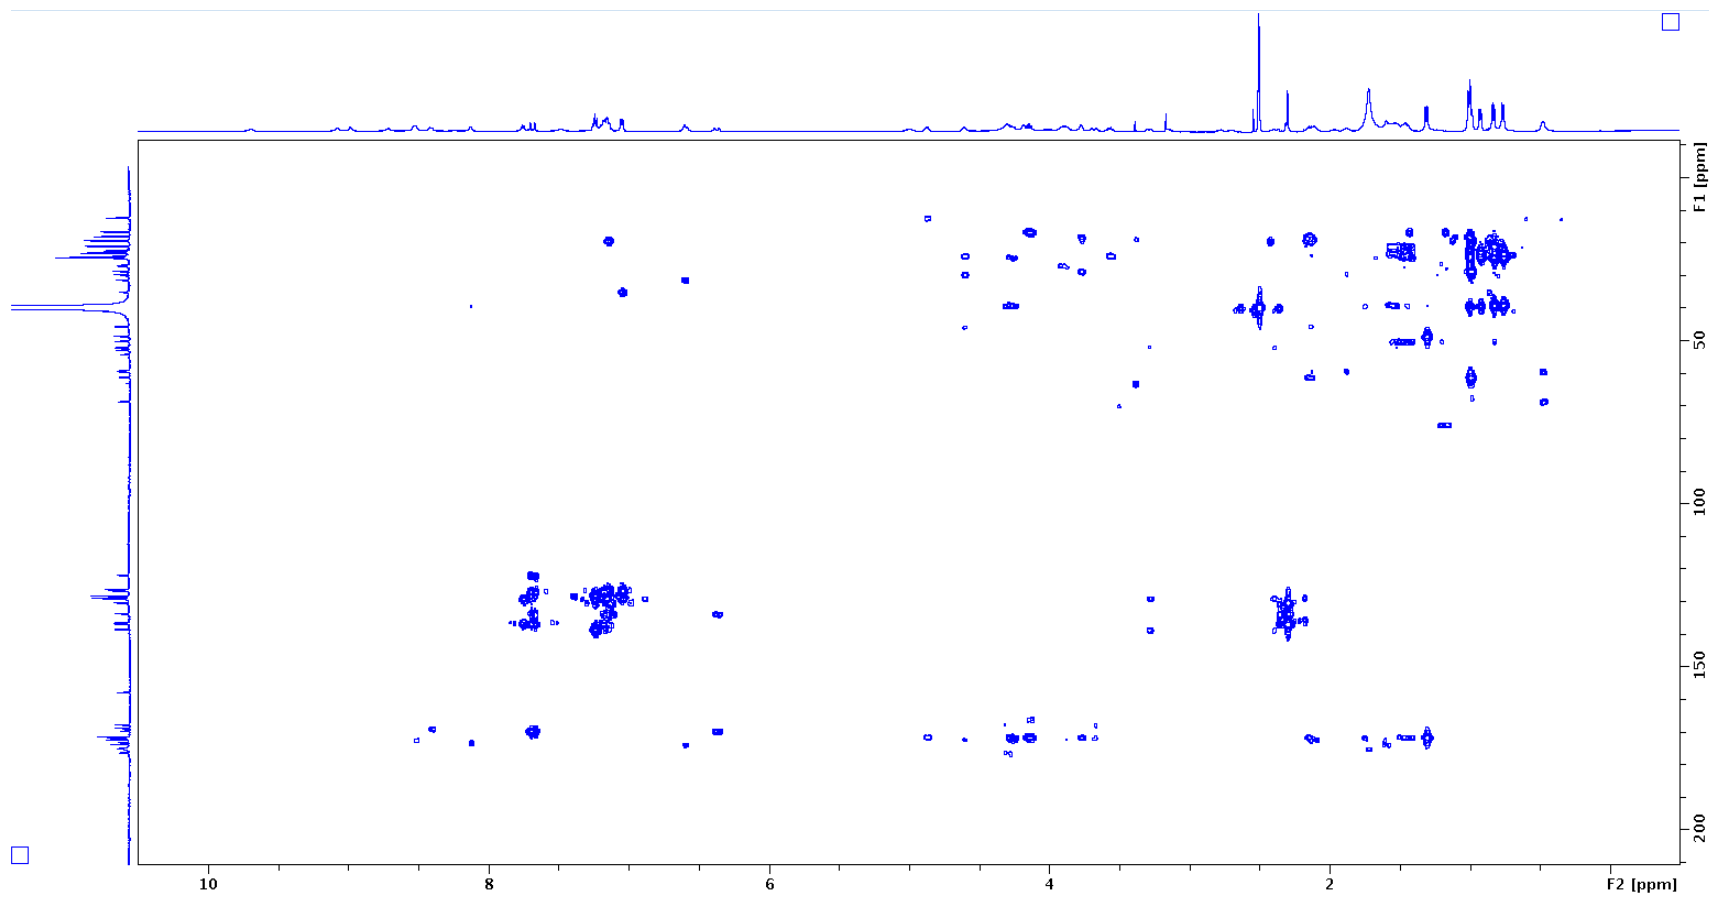



**Figure S6.** ROESY Spectrum of Eudistamide A (**1**; 500 MHz, DMSO-*d*<sub>6</sub>).

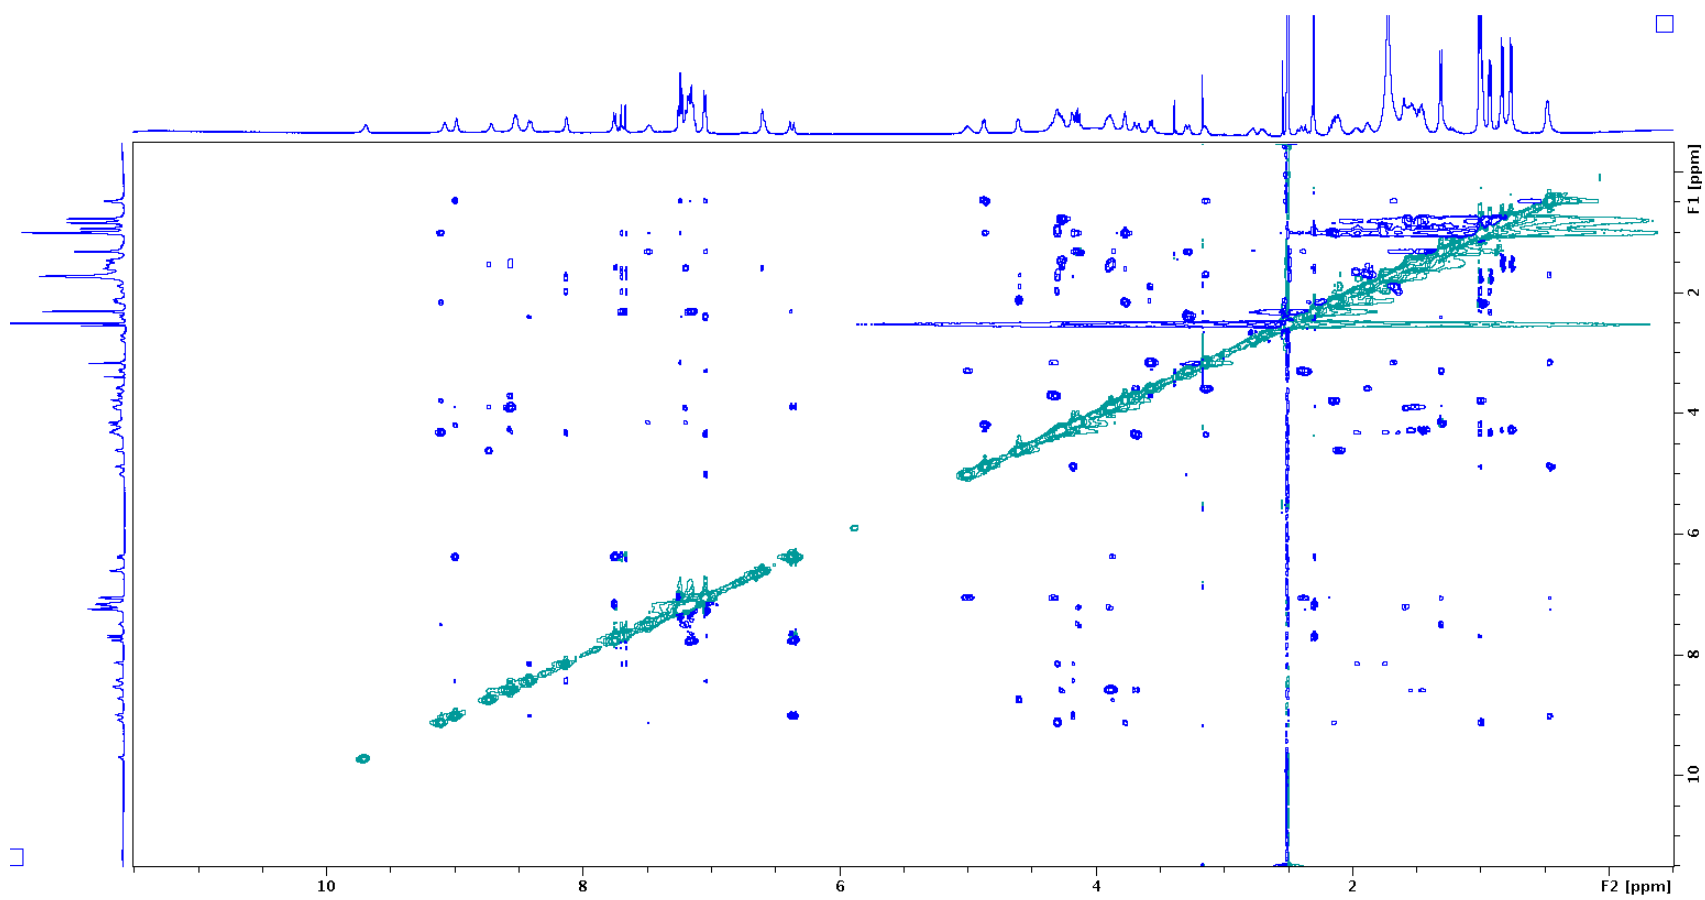

**Figure S7. HRESIMS of Eudistamide A (1).**

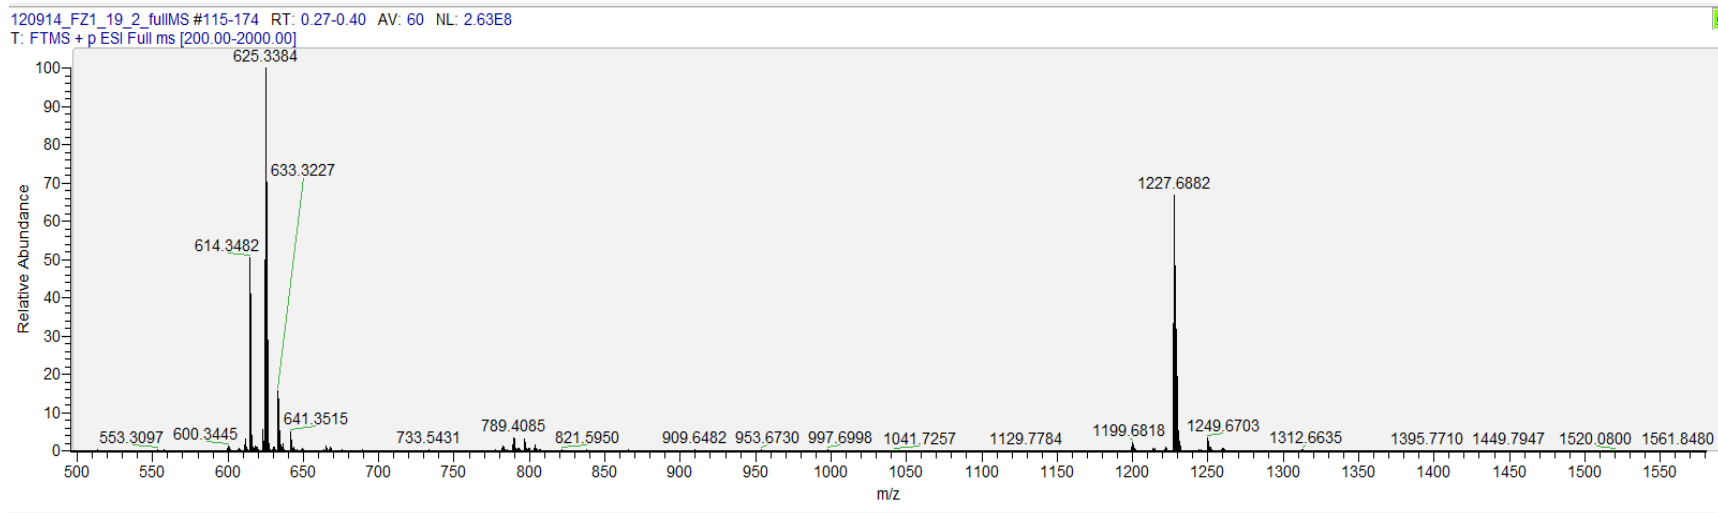

**Figure S8.** NHCA spectrum of  $^{13}\text{C}$ ,  $^{15}\text{N}$ -labeled **1** (800 MHz,  $\text{DMSO-}d_6$ ).

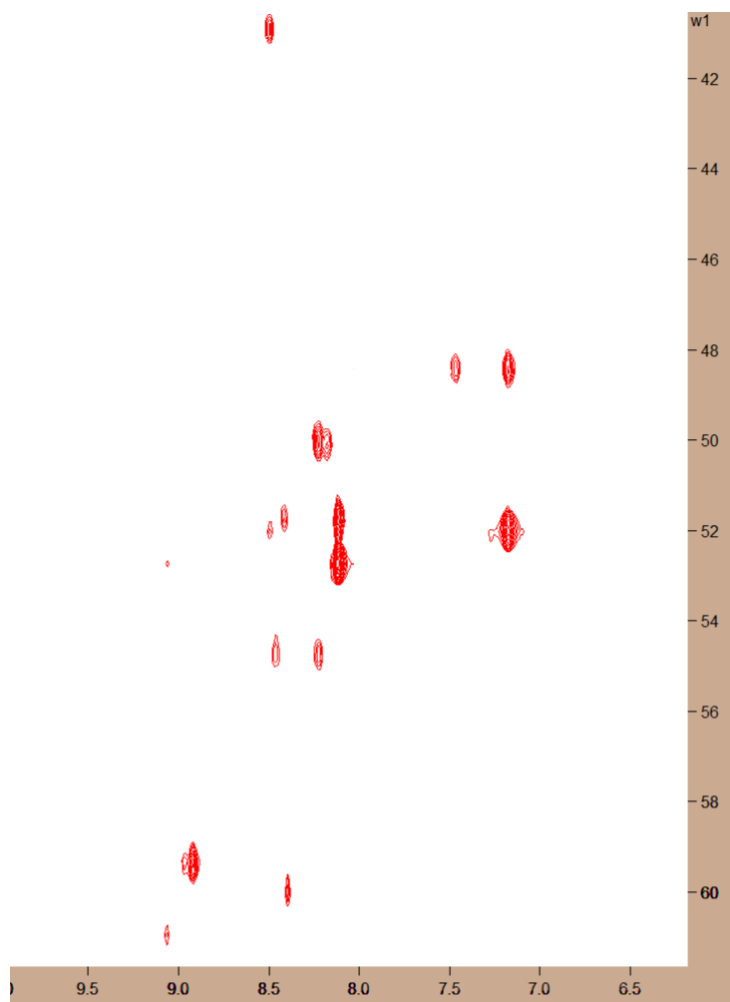

**Figure S9.** NH(CO)CA spectrum of  $^{13}\text{C}$ ,  $^{15}\text{N}$ -labeled **1** (800 MHz,  $\text{DMSO-}d_6$ ).

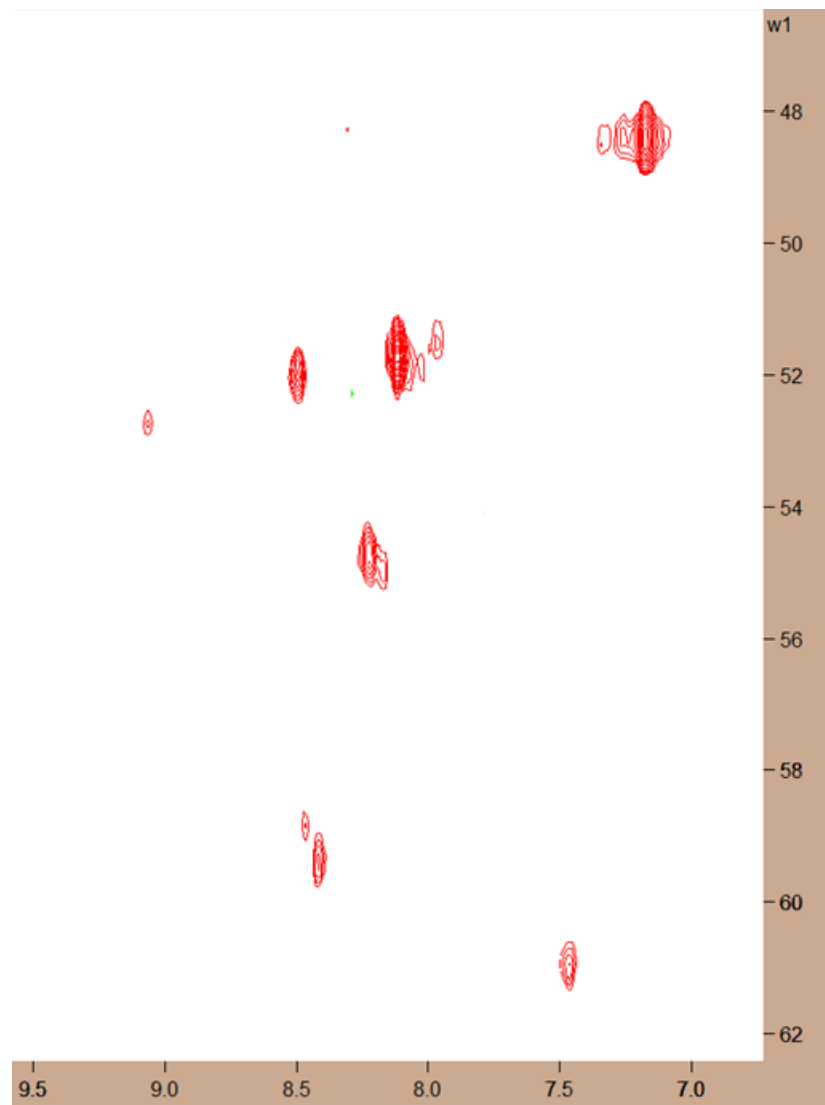

**Figure S10.** CBCANH spectrum of  $^{13}\text{C}$ ,  $^{15}\text{N}$ -labeled **1** (800 MHz, DMSO- $d_6$ ).

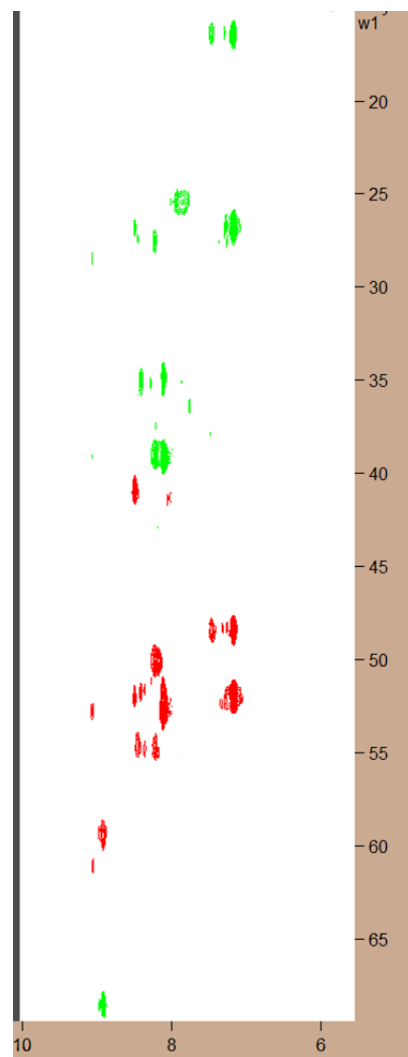

**Figure S11.** CBCA(CO)NH spectrum of  $^{13}\text{C}$ ,  $^{15}\text{N}$ -labeled **1** (800 MHz,  $\text{DMSO-}d_6$ ).

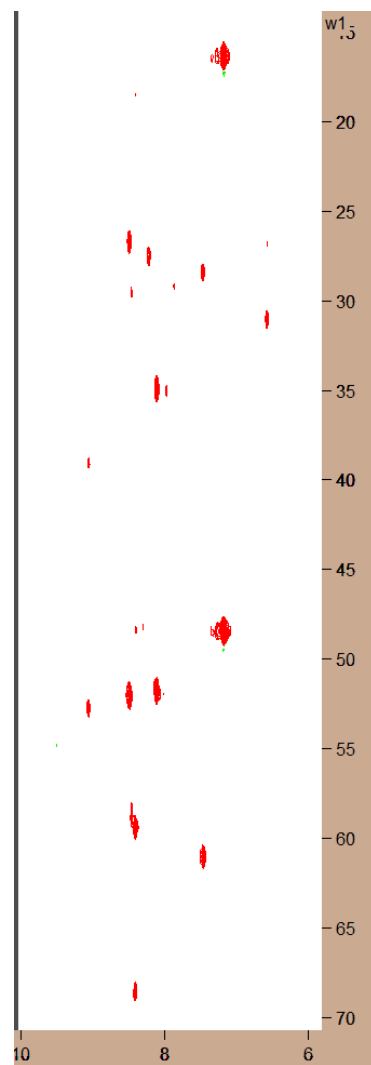

**Figure S12.** NHCO spectrum of  $^{13}\text{C}$ ,  $^{15}\text{N}$ -labeled **1** (800 MHz,  $\text{DMSO-}d_6$ ).

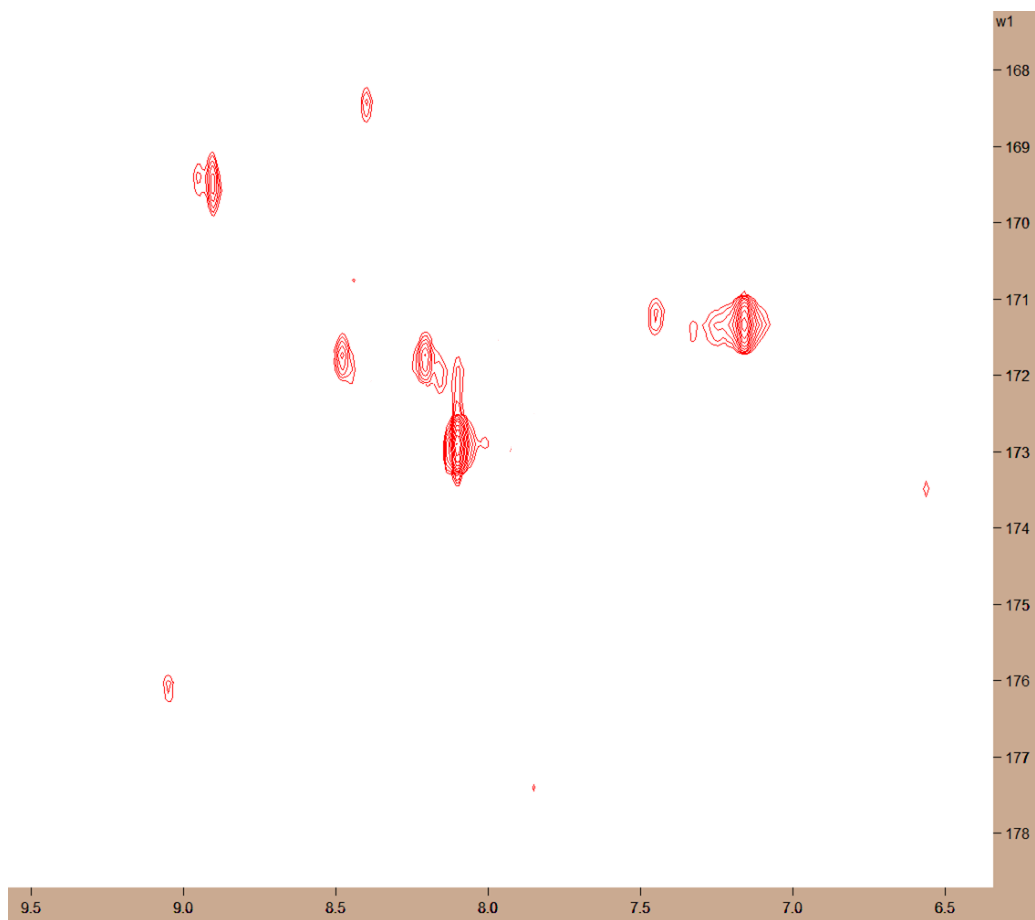

**Figure S13.** NH(CA)CO spectrum of  $^{13}\text{C}$ ,  $^{15}\text{N}$ -labeled **1** (800 MHz,  $\text{DMSO-}d_6$ ).

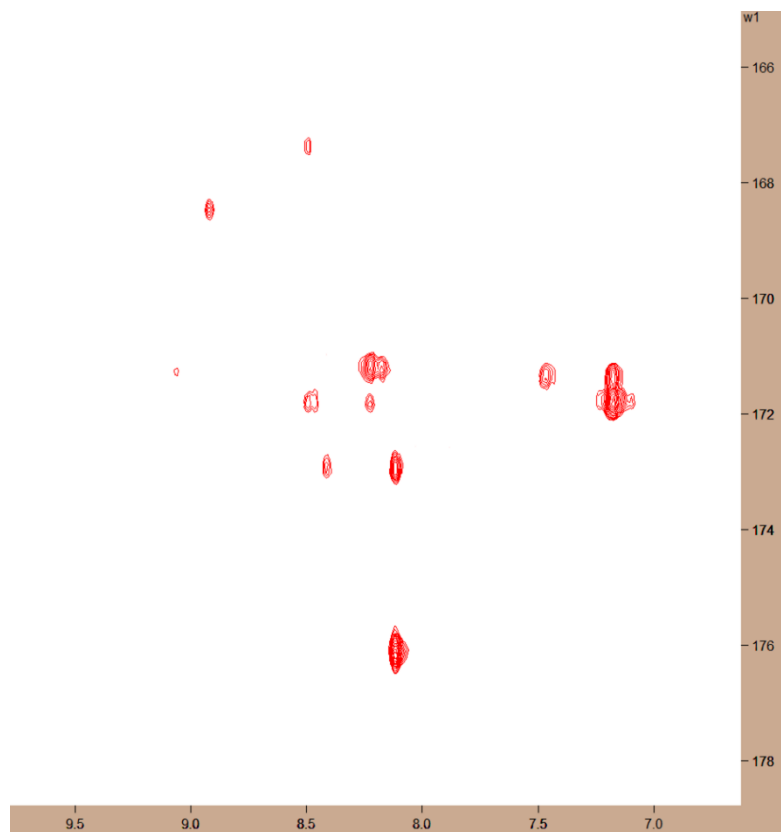



**Figure S14.** HCCH-TOCSY spectrum of  $^{13}\text{C}$ ,  $^{15}\text{N}$ -labeled **1**  
(800 MHz,  $\text{DMSO-}d_6$ ).

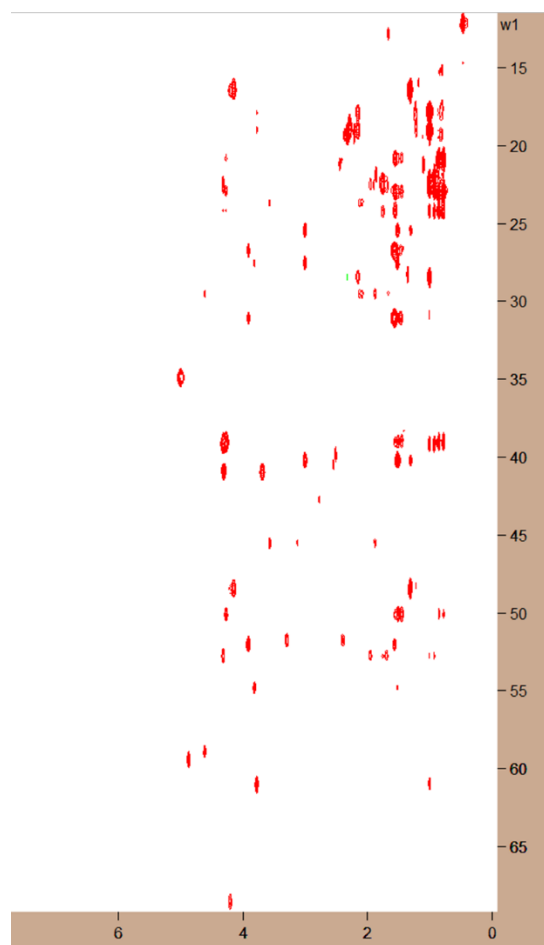

**Figure S15.**  $^1\text{H}$  NMR Spectrum of Eudistamide B (**2**; 500 MHz,  $\text{DMSO-}d_6$ ).

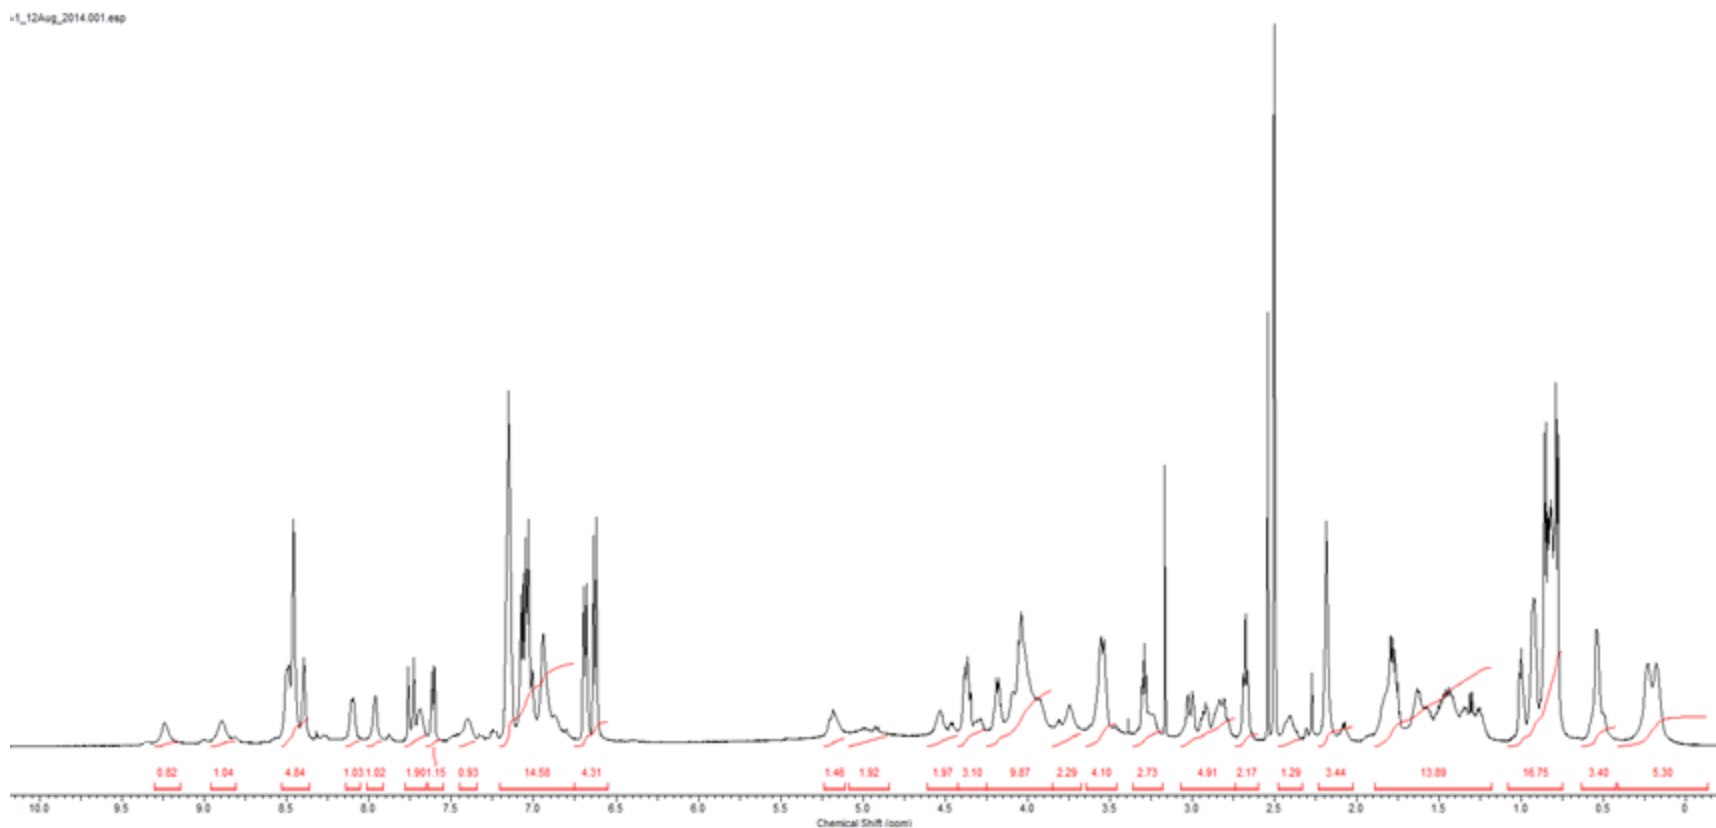

**Figure S16.**  $^1\text{H}$  NMR Spectrum of Eudistamide B (**2**; 500 MHz,  $\text{MeOD-}d_3$ ).

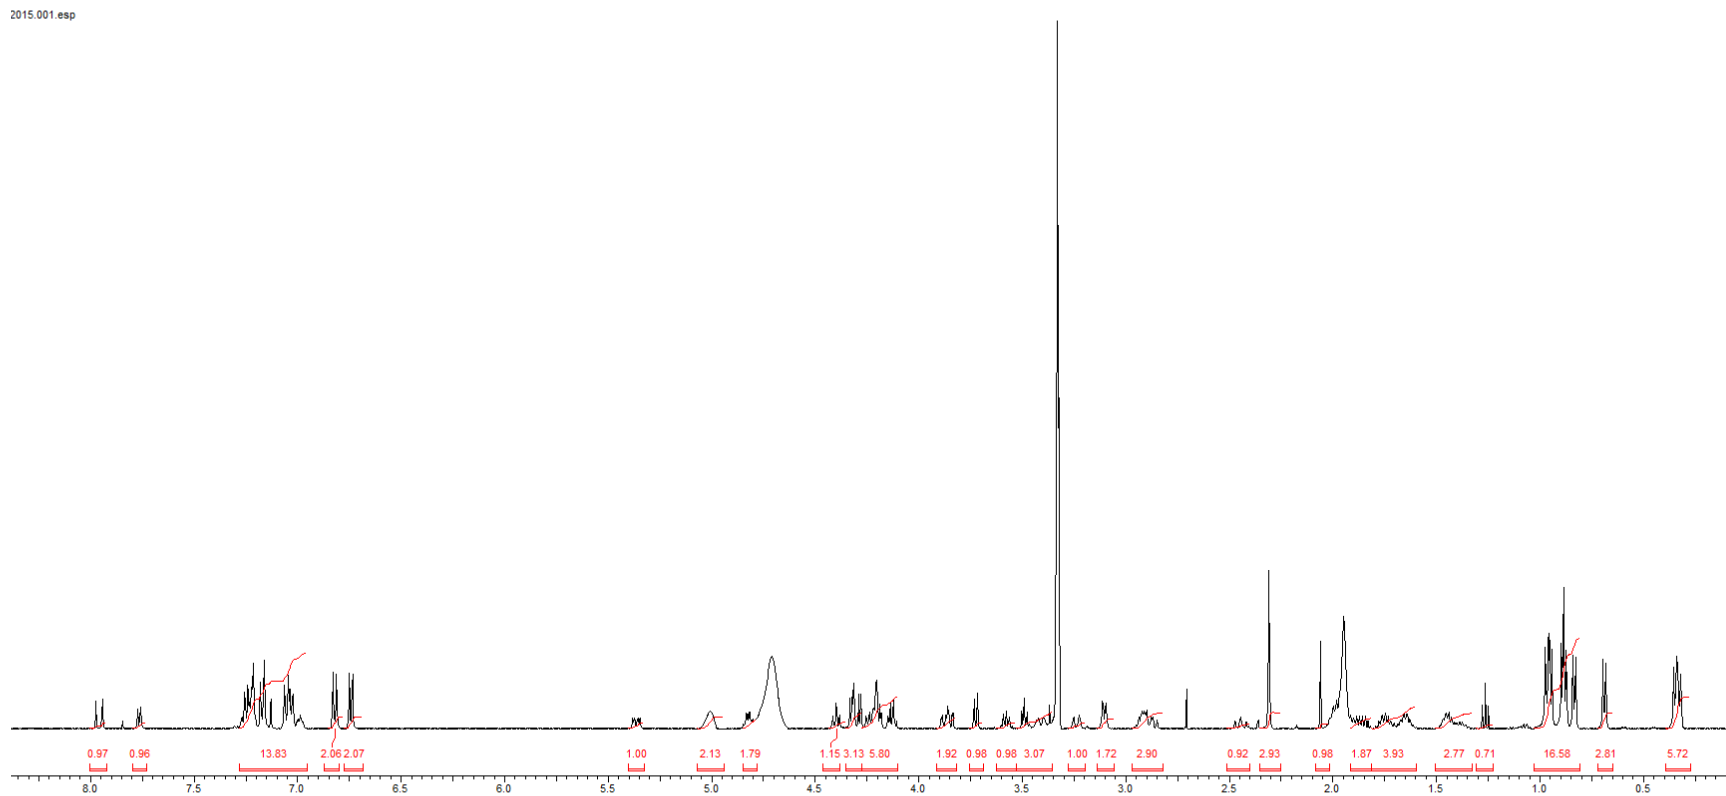

**Figure S17.**  $^{13}\text{C}$  NMR Spectrum of Eudistamide B (**2**; 125 MHz,  $\text{DMSO-}d_6$ ).

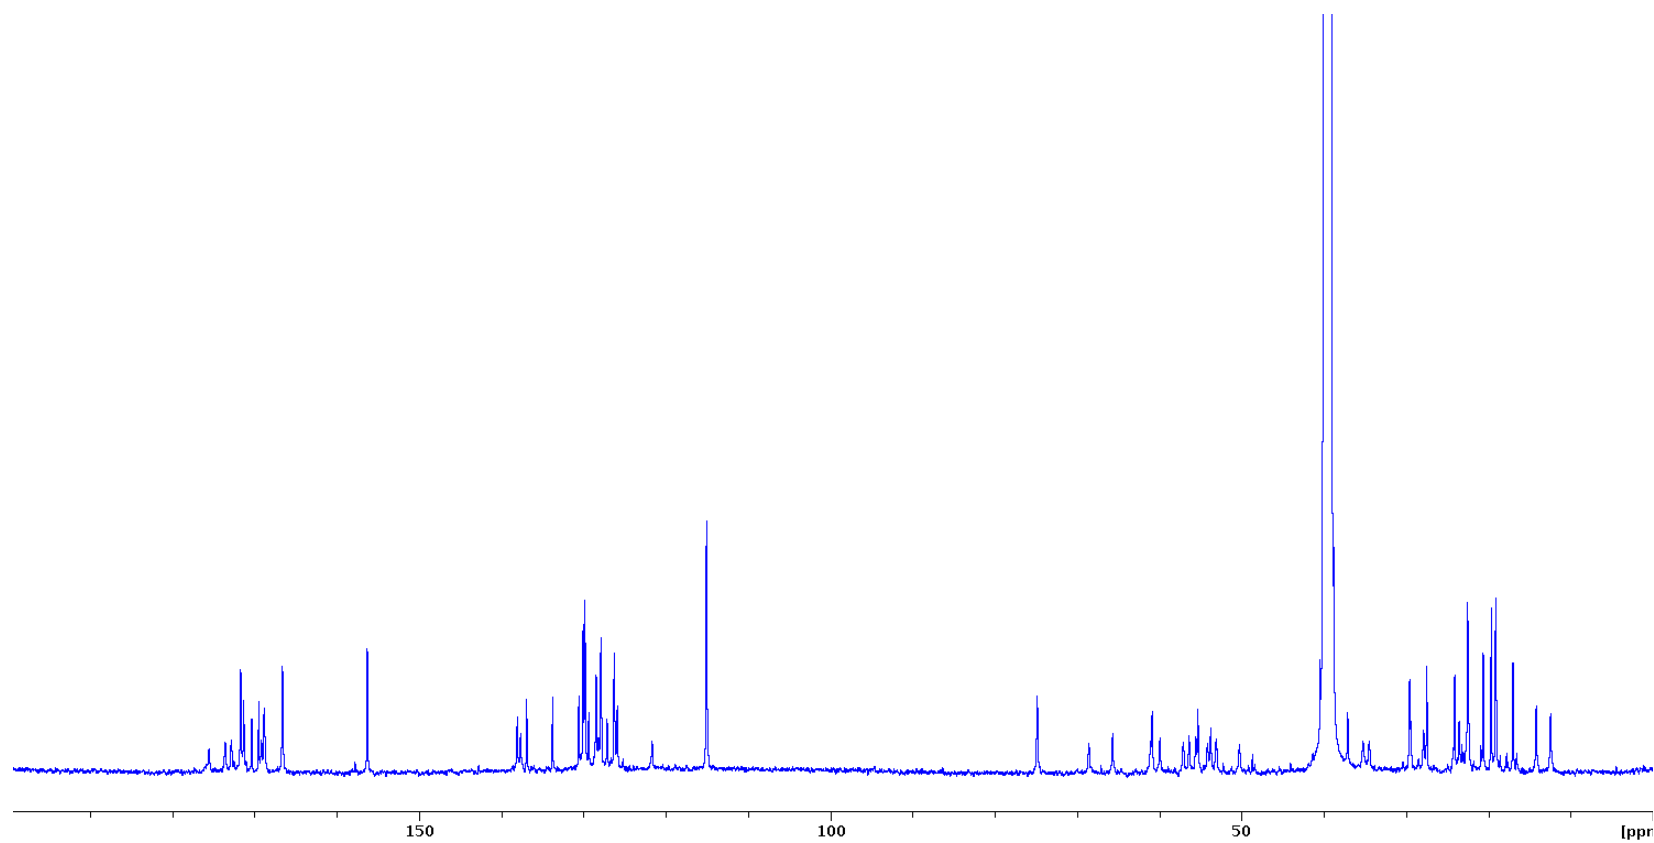

**Figure S18.** gCOSY Spectrum of Eudistamide B (**2**; 500 MHz, DMSO- $d_6$ ).

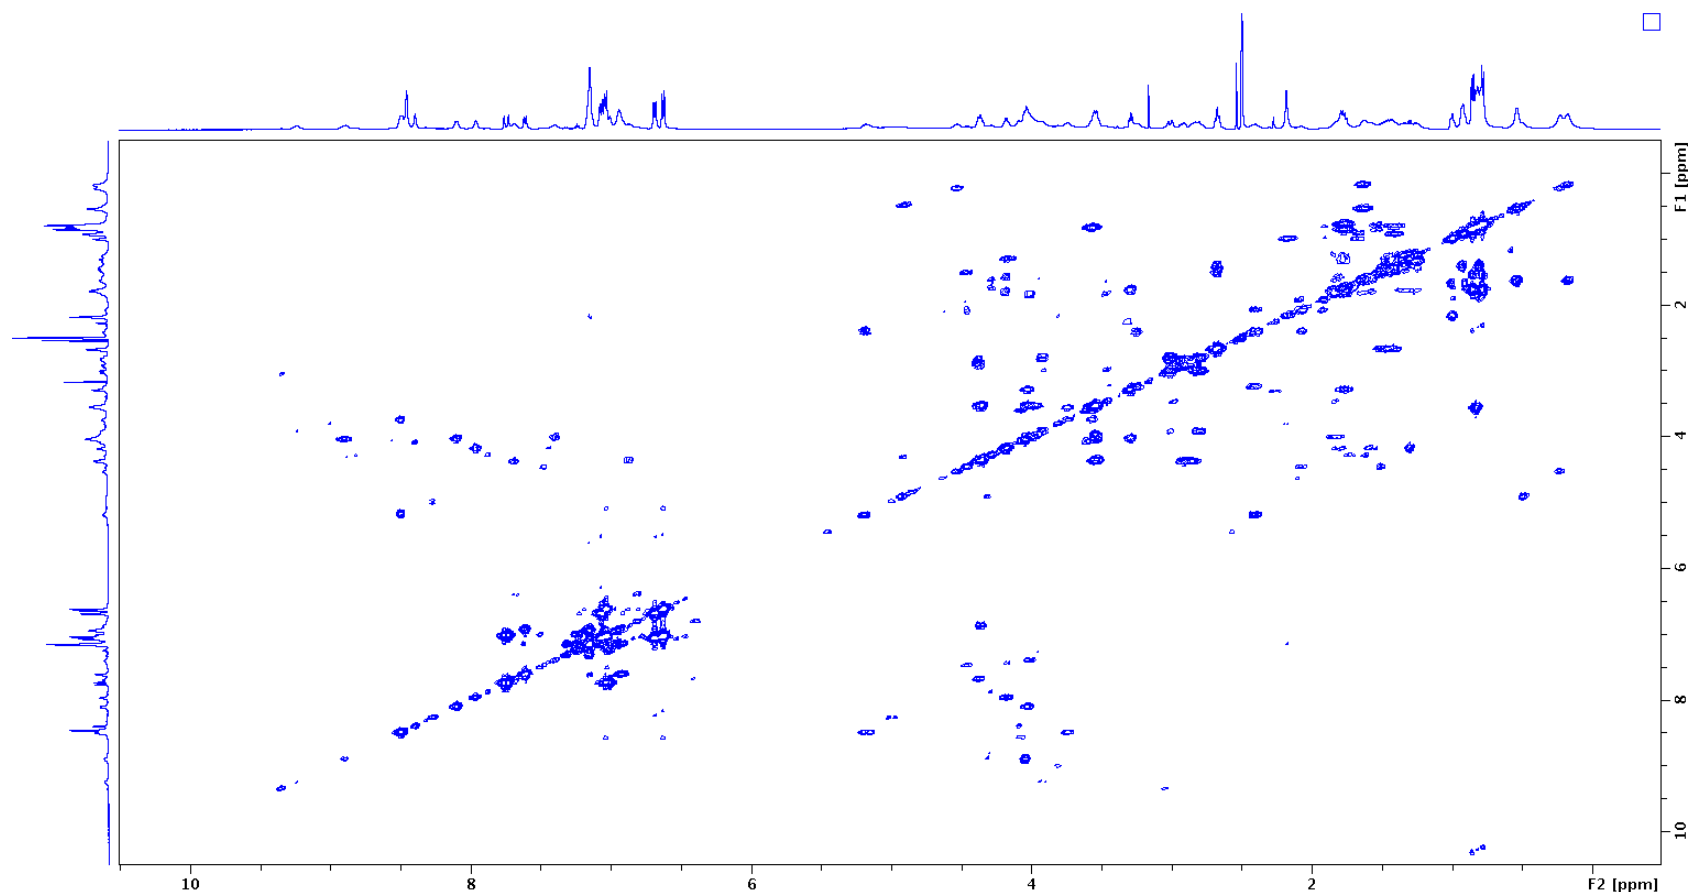

**Figure S19.** gHSQC NMR Spectrum of Eudistamide B (**2**; 500 MHz, DMSO-*d*<sub>6</sub>).

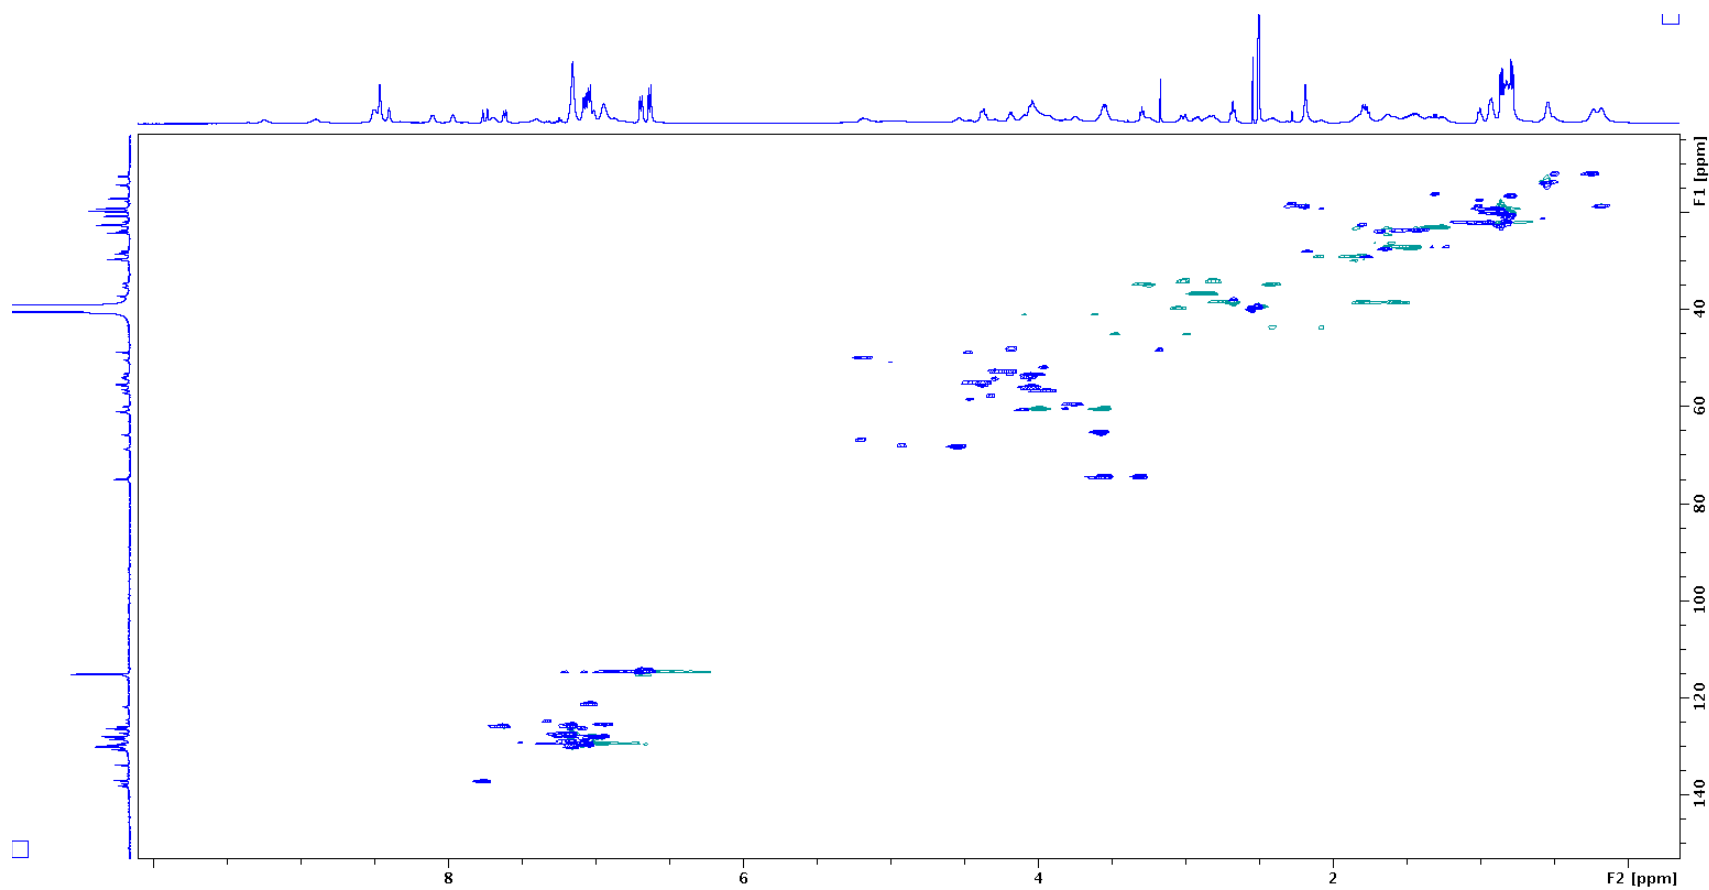

**Figure S20.** gHMBC NMR Spectrum of Eudistamide B (**2**; 500 MHz, DMSO-*d*<sub>6</sub>).

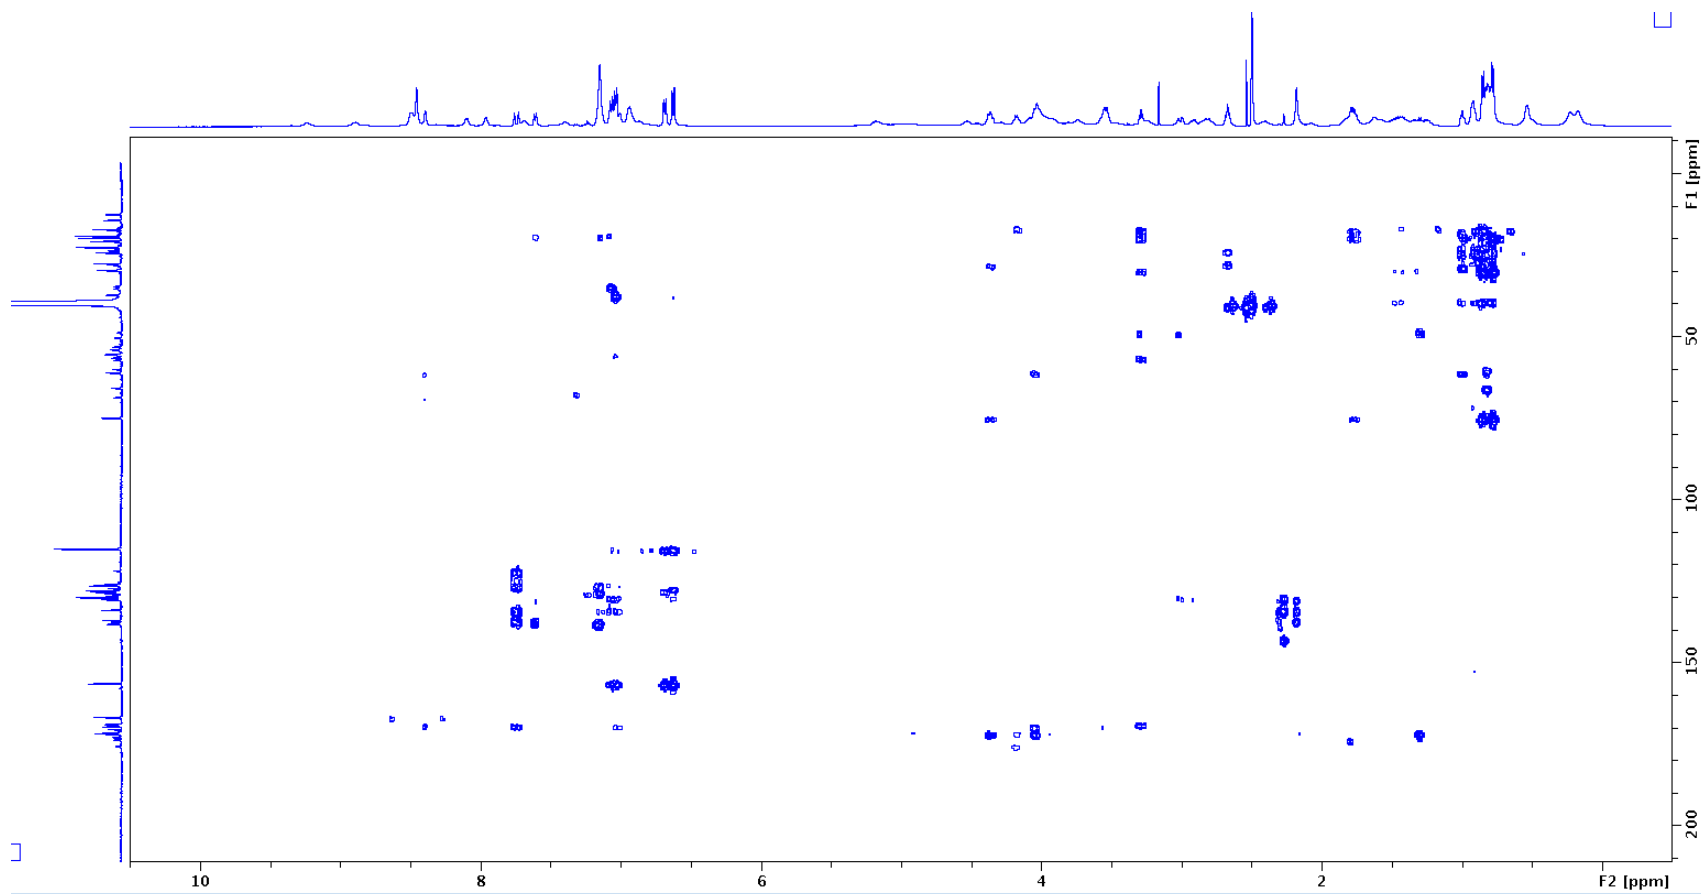

**Figure S21.** ROESY NMR Spectrum of Eudistamide B (**2**; 500 MHz, DMSO-*d*<sub>6</sub>).

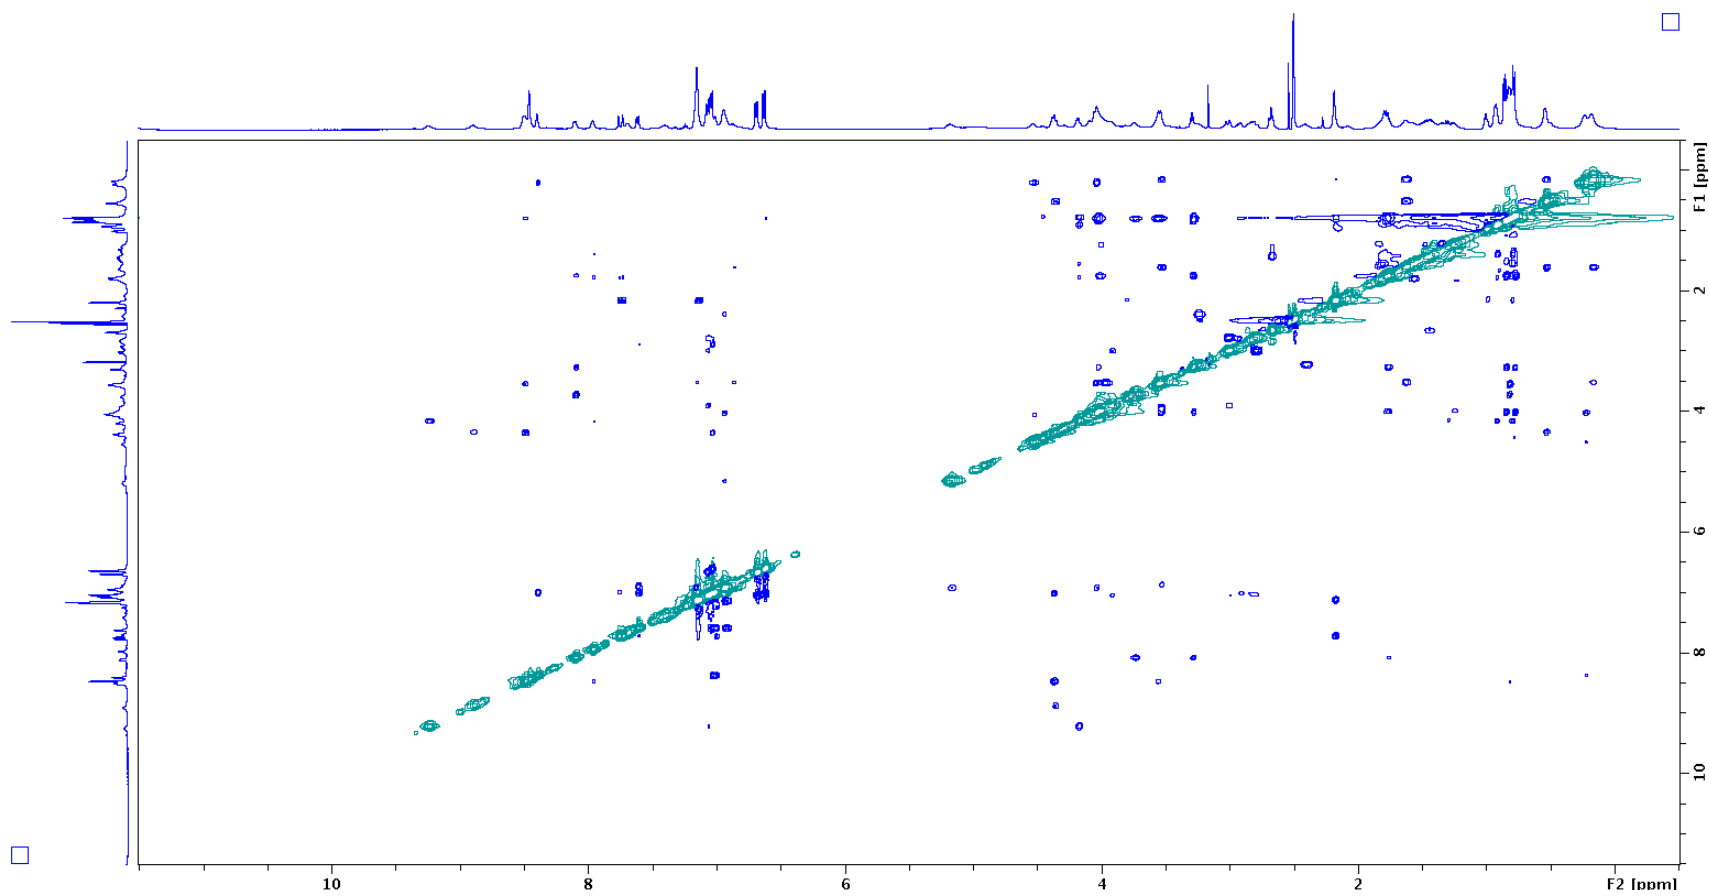



**Figure S22.** HRESIMS of Eudistamide B (2).

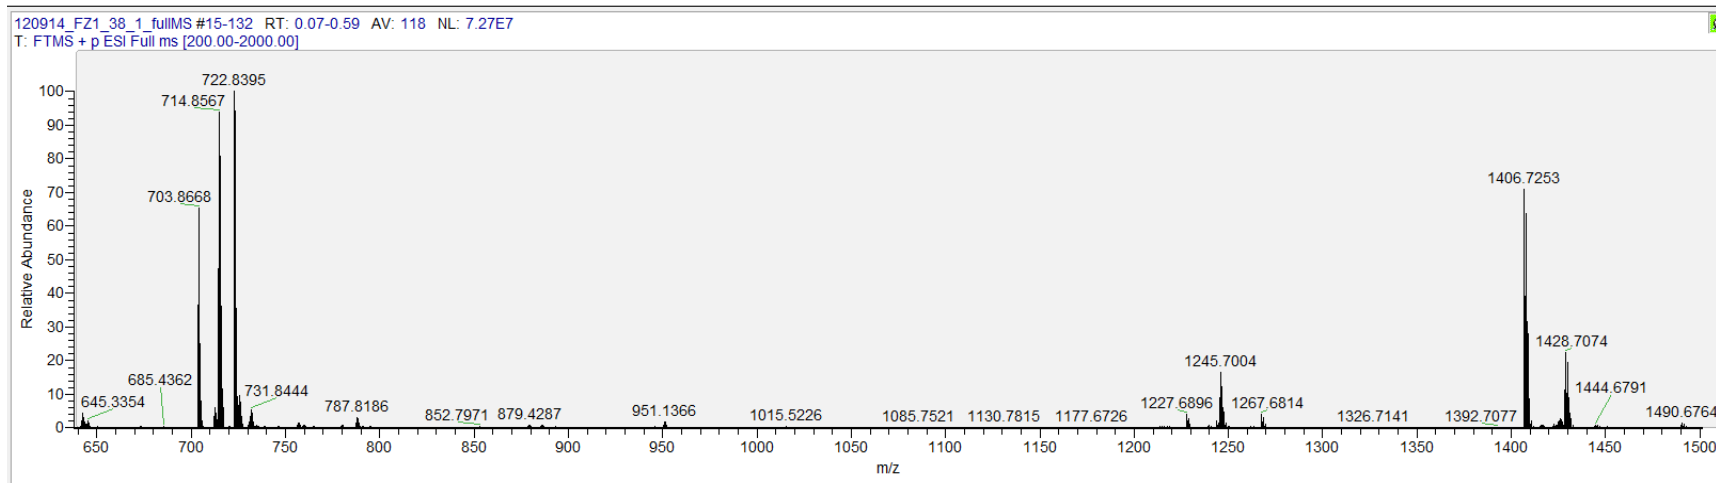

**Figure S23.** MS/MS spectrum of Eudistamide B (2).

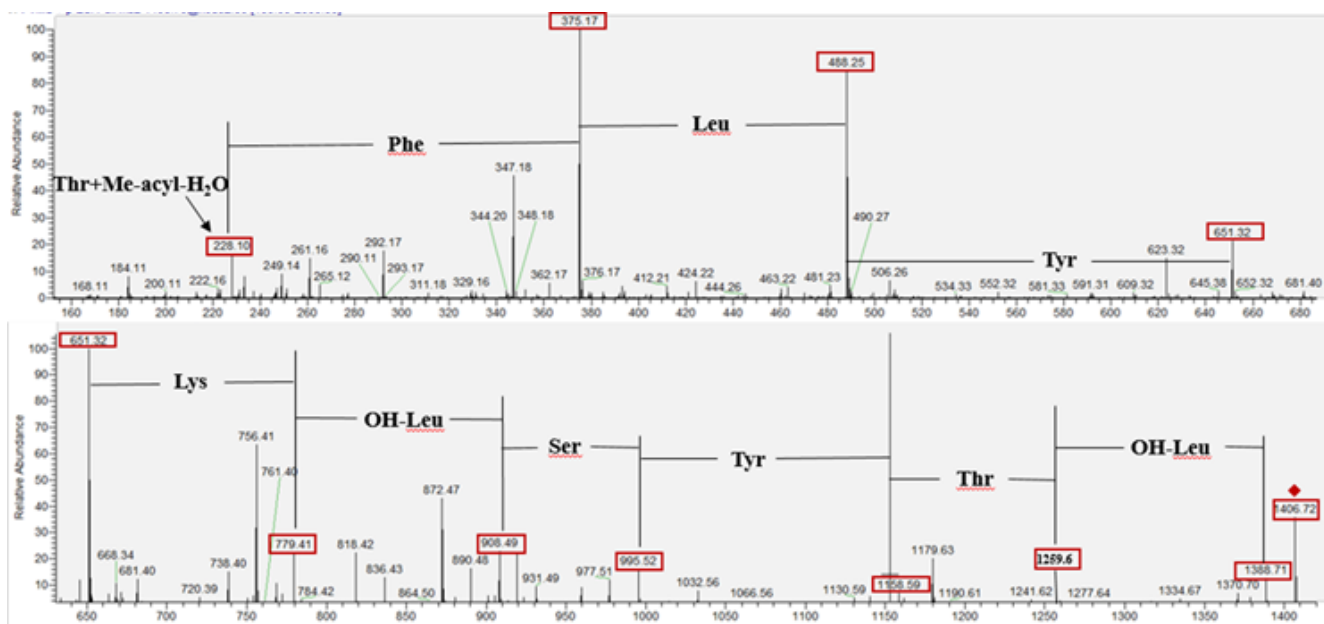

**Figure S24.** NHCA spectrum of  $^{13}\text{C}$ ,  $^{15}\text{N}$ -labeled **2** (800 MHz,  $\text{DMSO-}d_6$ ).

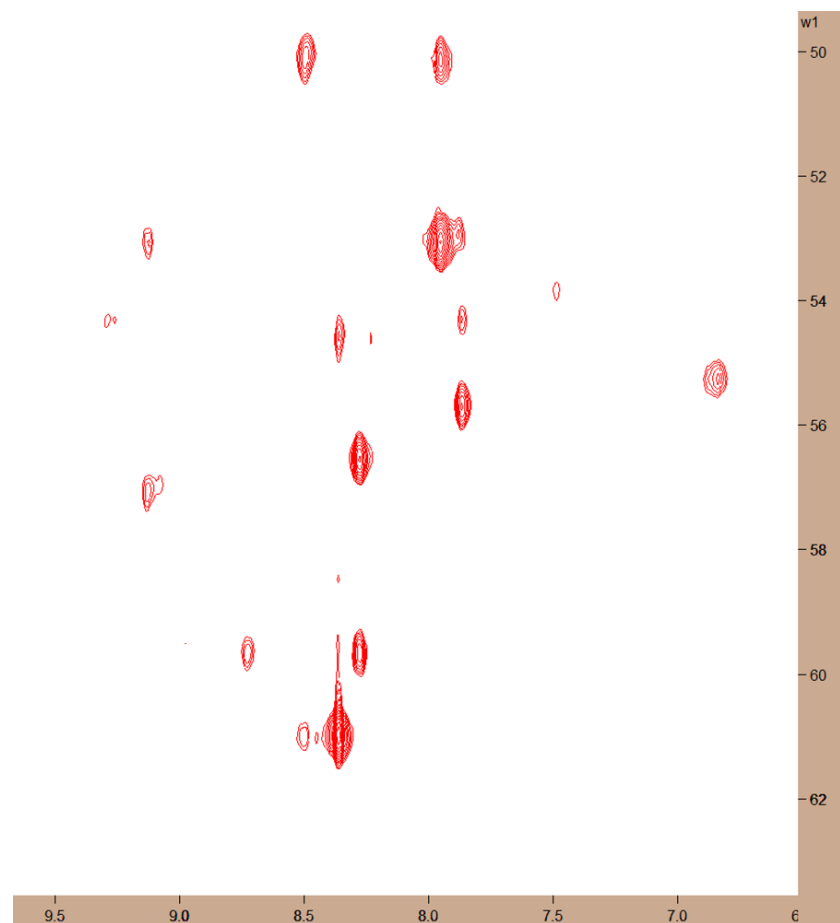

**Figure S25.** NH(CO)CA spectrum of  $^{13}\text{C}$ ,  $^{15}\text{N}$ -labeled **2** (800 MHz, DMSO- $d_6$ ).

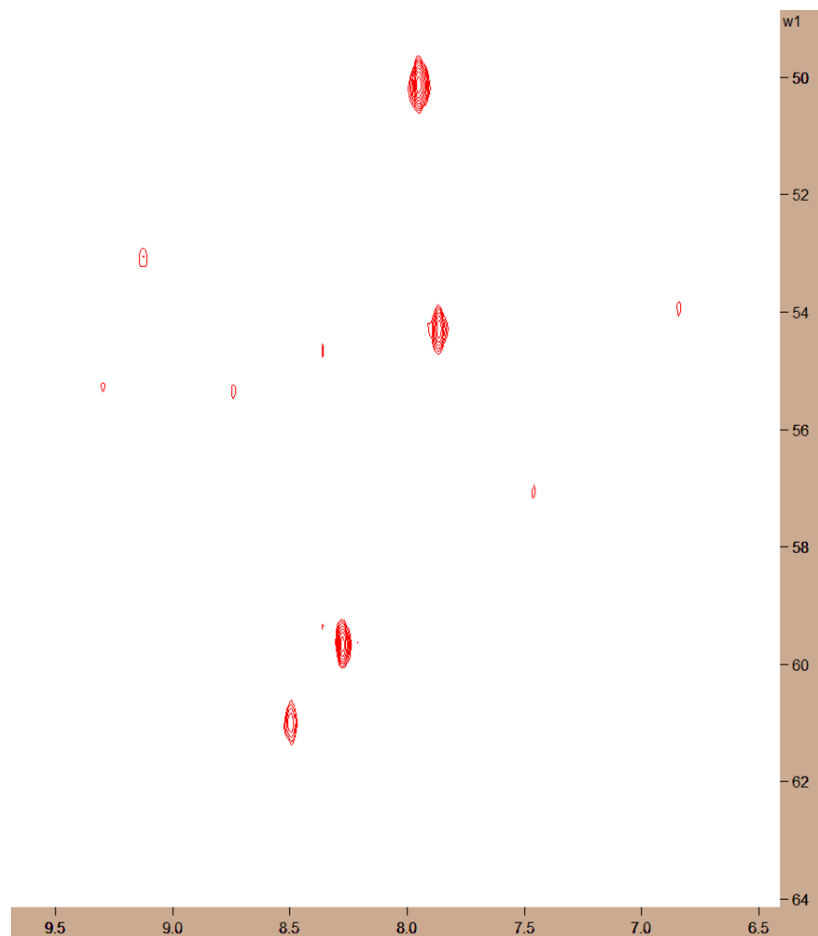

**Figure S26.** CBCANH spectrum of  $^{13}\text{C}$ ,  $^{15}\text{N}$ -labeled **2** (800 MHz,  $\text{DMSO-}d_6$ ).

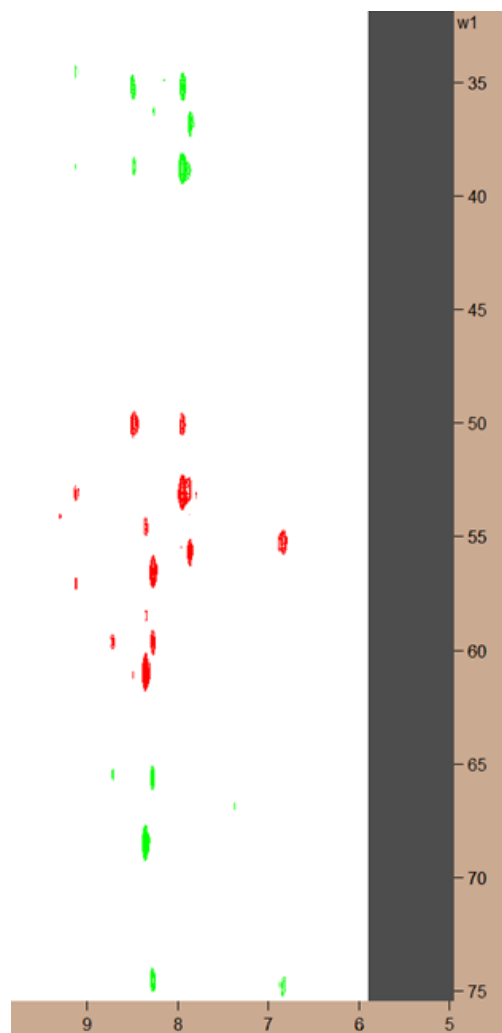

**Figure S27.** CBCA(CO)NH spectrum of  $^{13}\text{C}$ ,  $^{15}\text{N}$ -labeled **2** (800 MHz,  $\text{DMSO-}d_6$ ).

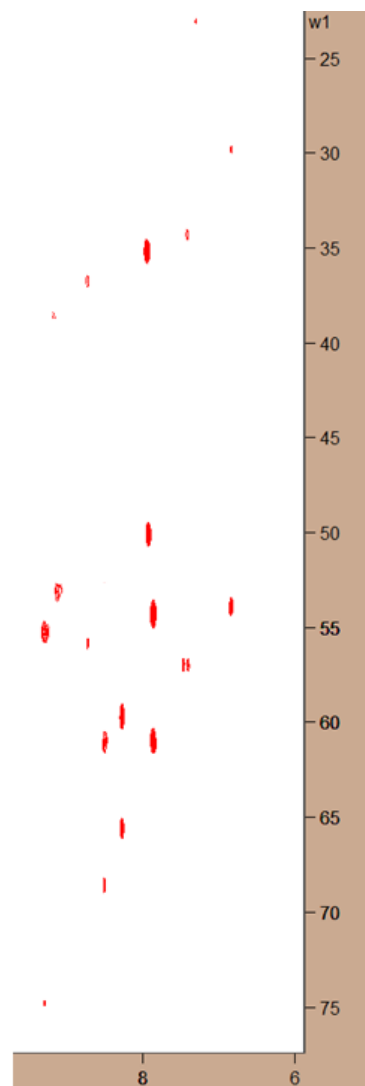

**Figure S28.** NHCO spectrum of  $^{13}\text{C}$ ,  $^{15}\text{N}$ -labeled **2** (800 MHz,  $\text{DMSO-}d_6$ ).

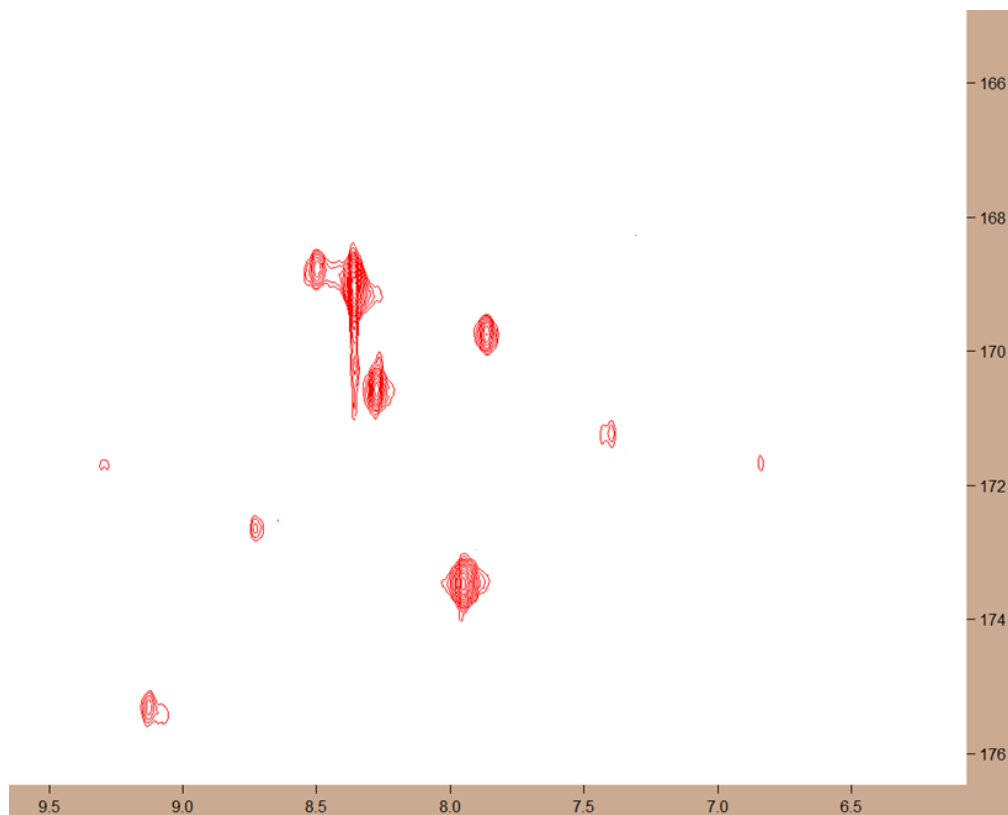

**Figure S29.** NH(CA)CO spectrum of  $^{13}\text{C}$ ,  $^{15}\text{N}$ -labeled **2** (800 MHz, DMSO- $d_6$ ).

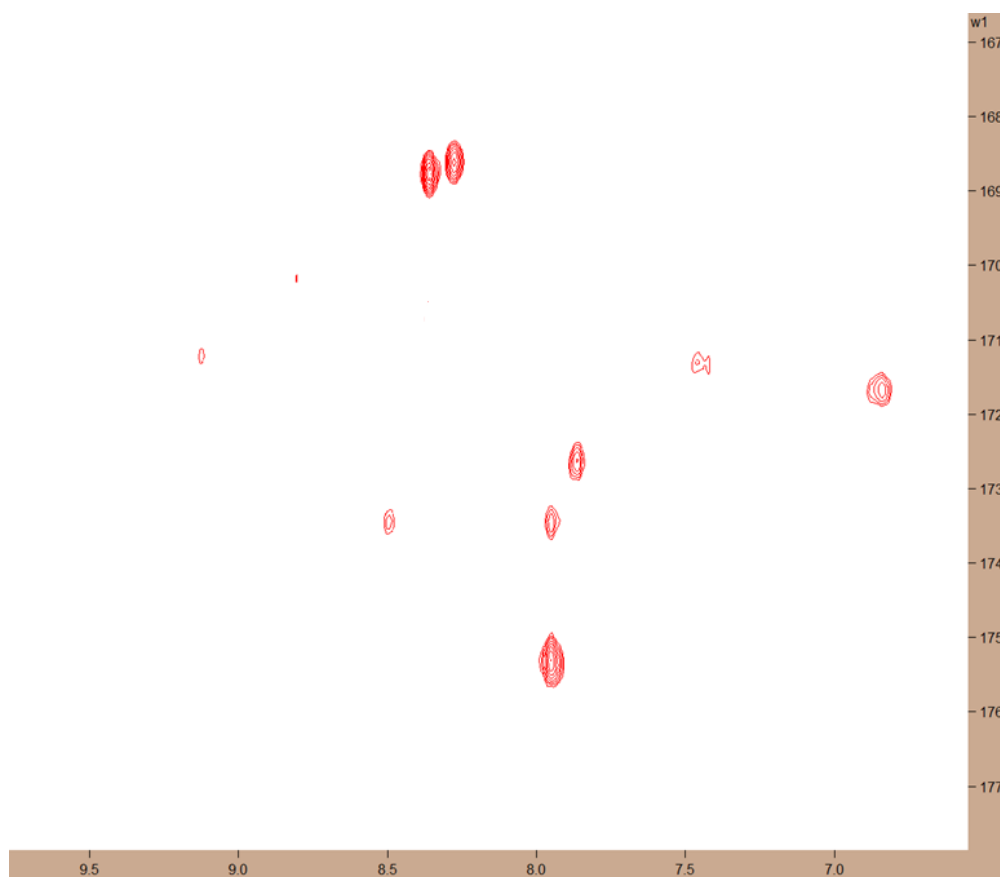



**Figure S30.** HCCH-TOCSY spectrum of  $^{13}\text{C}$ ,  $^{15}\text{N}$ -labeled **2**  
(800 MHz, DMSO- $d_6$ ).

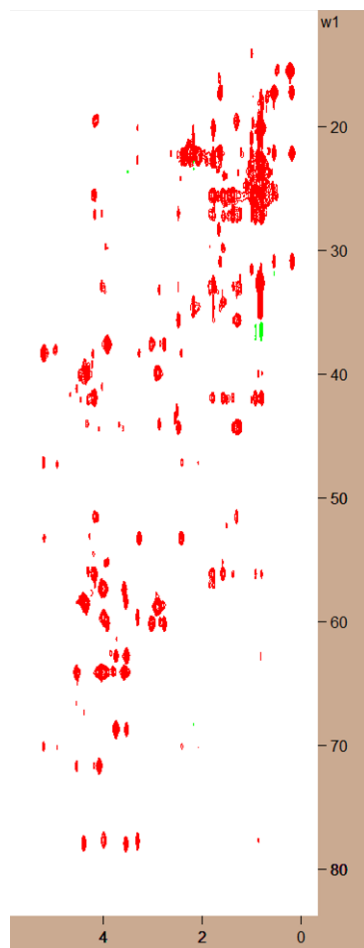

**Table S1.** 3D NMR data for Eudistamide A (**1**; 800 MHz, DMSO-*d*<sub>6</sub>).

| Position           | $\delta_C$ , mult.    | $\delta_H$ ( <i>J</i> in Hz) | CBCA(CO)NH | CBCANH      | NHCA | NH(CO)CA | NHCO | NH(CA)CO | HCCHTOCSY  |
|--------------------|-----------------------|------------------------------|------------|-------------|------|----------|------|----------|------------|
| 1                  | 171.4, C              |                              |            |             |      |          |      |          |            |
| 2                  | 49.9, CH              | 4.26, m                      |            |             |      |          |      |          | 3, 4, 5, 6 |
| 3                  | 38.9, CH <sub>2</sub> | 1.46, m                      |            |             |      |          |      |          | 2, 4, 5, 6 |
| 4                  | 24.2, CH              | 1.55, m                      |            |             |      |          |      |          | 2, 3, 5, 6 |
| 5                  | 23.0, CH <sub>3</sub> | 0.83, d (6.5)                |            |             |      |          |      |          | 2, 3, 4, 6 |
| 6                  | 20.8, CH <sub>3</sub> | 0.76, d (6.5)                |            |             |      |          |      |          | 2, 3, 4, 5 |
| 7-NH               |                       | 8.23, br s                   | 9, 10      | 2, 3; 9, 10 | 2, 9 | 9        | 8    | 1, 8     |            |
| 8                  | 171.8, C              |                              |            |             |      |          |      |          |            |
| 9                  | 54.7, CH              | 3.87, m                      |            |             |      |          |      |          | 10, 11b    |
| 10                 | 27.0, CH <sub>2</sub> | 1.52, m                      |            |             |      |          |      |          | 9, 11, 12  |
| 11                 | 24.7, CH <sub>2</sub> | 1.46, m<br>1.30, m           |            |             |      |          |      |          | 9, 12      |
| 12                 | 38.9, CH <sub>2</sub> | 2.77, m<br>2.70, m           |            |             |      |          |      |          | 9, 10, 11  |
| 13-NH              |                       |                              |            |             |      |          |      |          |            |
| 14                 | 157.8, C              |                              |            |             |      |          |      |          |            |
| 15-NH <sub>2</sub> |                       |                              |            |             |      |          |      |          |            |
| 16-NH              |                       |                              |            |             |      |          |      |          |            |
| 17-NH              |                       | 8.46, br s                   | 19, 20     | 9, 10       | 9    | 19       | 18   | 8        |            |
| 18                 | 171.8, C              |                              |            |             |      |          |      |          |            |
| 19                 | 59.0, CH              | 4.60, d (3.7)                |            |             |      |          |      |          | 20, 21     |
| 20                 | 29.5, CH <sub>2</sub> | 2.10, m                      |            |             |      |          |      |          | 19, 21, 22 |
| 21                 | 23.7, CH <sub>2</sub> | 1.88, m<br>1.71, m           |            |             |      |          |      |          | 19, 22     |
| 22                 | 45.5, CH <sub>2</sub> | 3.57, m<br>3.15, m           |            |             |      |          |      |          | 19, 20, 21 |
| 23                 | 167.5, CH             |                              |            |             |      |          |      |          |            |

|                    |                       |                                        |        |                   |        |    |    |        |                |
|--------------------|-----------------------|----------------------------------------|--------|-------------------|--------|----|----|--------|----------------|
| 24                 | 40.9, CH <sub>2</sub> | 4.32, d<br>(15.8)<br>3.68, d<br>(15.8) |        |                   |        |    |    |        |                |
| 25-NH              |                       | 8.50, br s                             | 27, 28 | 24; 27, 28        | 24, 27 | 27 | 26 | 23, 26 |                |
| 26                 | 171.8, C              |                                        |        |                   |        |    |    |        |                |
| 27                 | 52.1, CH              | 3.90, m                                |        |                   |        |    |    |        | 28             |
| 28                 | 26.7, CH <sub>2</sub> | 1.58, m                                |        |                   |        |    |    |        | 27, 29         |
| 29                 | 31.1, CH <sub>2</sub> | 1.58, m                                |        |                   |        |    |    |        | 27, 28         |
| 30                 | 173.6, C              |                                        |        |                   |        |    |    |        |                |
| 31-NH <sub>2</sub> |                       | 6.60, s; 6.58,<br>s                    |        |                   |        |    | 30 |        |                |
| 32-NH              |                       | 7.18                                   | 34, 35 | 34, 35;<br>27, 28 | 27, 34 | 34 | 33 | 26, 33 |                |
| 33                 | 171.4, C              |                                        |        |                   |        |    |    |        |                |
| 34                 | 48.4, CH              | 4.14, m                                |        |                   |        |    |    |        | 35             |
| 35                 | 16.4, CH <sub>3</sub> | 1.31, d (7.4)                          |        |                   |        |    |    |        | 34             |
| 36-NH              |                       | 7.48, br s                             | 38, 39 | 34, 35            | 34     | 38 | 37 | 33, 37 |                |
| 37                 | 171.4, C              |                                        |        |                   |        |    |    |        |                |
| 38                 | 61.0, CH              | 3.77, br s                             |        |                   |        |    |    |        | 39, 40, 41     |
| 39                 | 28.4, CH              | 2.14                                   |        |                   |        |    |    |        | 38, 40, 41     |
| 40                 | 19.0, CH <sub>3</sub> | 1.00, d (6.8)                          |        |                   |        |    |    |        | 38, 39, 41     |
| 41                 | 17.8, CH <sub>3</sub> | 0.99, d (6.8)                          |        |                   |        |    |    |        | 38, 39, 40     |
| 42-NH              |                       | 9.07, br s                             | 44, 45 | 38, 39;<br>44, 45 | 38, 44 | 44 | 43 | 37     |                |
| 43                 | 176.2, C              |                                        |        |                   |        |    |    |        |                |
| 44                 | 52.7, CH              | 4.30, m                                |        |                   |        |    |    |        | 45, 46, 47, 48 |
| 45                 | 39.0, CH <sub>2</sub> | 1.97, m<br>1.65, m                     |        |                   |        |    |    |        | 44, 46, 47, 48 |
| 46                 | 23.0, CH              | 1.72, m                                |        |                   |        |    |    |        |                |
| 47                 | 22.7, CH <sub>3</sub> | 1.00, d (6.8)                          |        |                   |        |    |    |        | 44, 45, 46, 48 |
| 48                 | 22.2, CH <sub>3</sub> | 0.92, d (6.4)                          |        |                   |        |    |    |        | 44, 45, 46, 47 |
| 49-NH              |                       | 8.12, br s                             | 51, 52 | 44, 45;<br>51, 52 | 44, 51 | 51 | 50 | 43, 50 |                |

|       |                       |                              |        |        |    |    |    |    |        |
|-------|-----------------------|------------------------------|--------|--------|----|----|----|----|--------|
| 50    | 173.0, C              |                              |        |        |    |    |    |    |        |
| 51    | 51.8, CH              | 5.00, br s                   |        |        |    |    |    |    | 52     |
| 52    | 34.8, CH <sub>2</sub> | 3.28, d (10)<br>2.39, d (10) |        |        |    |    |    |    | 51     |
| 53    | 138.3, C              |                              |        |        |    |    |    |    |        |
| 54    | 128.8, CH             | 7.04, d (7.4)                |        |        |    |    |    |    |        |
| 55    | 128.0, CH             | 7.24, t (7.4)                |        |        |    |    |    |    |        |
| 56    | 126.1, CH             | 7.15, t (7.4)                |        |        |    |    |    |    |        |
| 57    | 128.0, CH             | 7.24, t (7.4)                |        |        |    |    |    |    |        |
| 58    | 128.8, CH             | 7.04, d (7.4)                |        |        |    |    |    |    |        |
| 59-NH |                       | 8.41, d (8.9)                | 61, 62 | 51, 52 | 51 | 61 | 60 | 50 |        |
| 60    | 168.6, C              |                              |        |        |    |    |    |    |        |
| 61    | 59.3, CH              | 4.18, m                      |        |        |    |    |    |    | 62     |
| 62    | 68.5, CH              | 4.87, m                      |        |        |    |    |    |    | 61, 63 |
| 63    | 12.1, CH <sub>3</sub> | 0.48, d (5.3)                |        |        |    |    |    |    | 61, 62 |
| 64-NH |                       | 8.92, br s                   |        | 61, 62 | 61 |    | 65 | 60 |        |
| 65    | 169.5, C              |                              |        |        |    |    |    |    |        |
| 66    | 121.7, CH             | 6.37, d<br>(15.5)            |        |        |    |    |    |    |        |
| 67    | 136.2, CH             | 7.69, d<br>(15.5)            |        |        |    |    |    |    |        |
| 68    | 133.5, C              |                              |        |        |    |    |    |    |        |
| 69    | 136.6, C              |                              |        |        |    |    |    |    |        |
| 70    | 130.2, CH             | 7.14, m                      |        |        |    |    |    |    |        |
| 71    | 130.2, CH             | 7.14, m                      |        |        |    |    |    |    |        |
| 72    | 128.9, CH             | 7.18, m                      |        |        |    |    |    |    |        |
| 73    | 126.5, CH             | 7.75, d (7.4)                |        |        |    |    |    |    |        |
| 74    | 19.2, CH <sub>3</sub> | 2.30, s                      |        |        |    |    |    |    |        |

**Table S2.** 3D NMR data for Eudistamide B (**2**; 800 MHz, DMSO-*d*<sub>6</sub>).

| Position | $\delta_C$ , mult.    | $\delta_H$ ( <i>J</i> in Hz)    | CBCANH      | CBCA(CO)NH | NHCA   | NHCOCA | NHCO | NHCACO | HCCHTOCSY  |
|----------|-----------------------|---------------------------------|-------------|------------|--------|--------|------|--------|------------|
| 1        | 168.8, C              |                                 |             |            |        |        |      |        |            |
| 2        | 56.4, CH              | 4.03, m                         |             |            |        |        |      |        | 3, 4, 5, 6 |
| 3        | 74.8, CH              | 3.29, m                         |             |            |        |        |      |        | 2, 4, 5, 6 |
| 4        | 29.5, CH              | 1.77, m                         |             |            |        |        |      |        |            |
| 5        | 19.1, CH <sub>3</sub> | 0.86, d (7.0)                   |             |            |        |        |      |        |            |
| 6        | 16.7, CH <sub>3</sub> | 0.78, d (7.0)                   |             |            |        |        |      |        |            |
| 7-NH     |                       | 8.28, d (6.0)                   | 2, 3; 9, 10 | 9, 10      | 2, 9   | 9      | 8    | 1      |            |
| 8        | 170.3, C              |                                 |             |            |        |        |      |        |            |
| 9        | 59.9, CH              | 3.74, m                         |             |            |        |        |      |        | 10, 11     |
| 10       | 65.6, CH              | 3.56, m                         |             |            |        |        |      |        | 9, 11      |
| 11       | 20.6, CH <sub>3</sub> | 0.83, d (6.0)                   |             |            |        |        |      |        |            |
| 12-NH    |                       | 8.74, br s                      | 9, 10       | 14, 15     | 9      | 14     | 13   | 8      |            |
| 13       | 172.8, C              |                                 |             |            |        |        |      |        |            |
| 14       | 55.5, CH              | 4.34, m                         |             |            |        |        |      |        | 15         |
| 15       | 37.0, CH <sub>2</sub> | 2.83, d (12.5)<br>2.92 d (12.5) |             |            |        |        |      |        | 14         |
| 16       | 127.1, C              |                                 |             |            |        |        |      |        |            |
| 17       | 130.0, CH             | 7.04, d (8.0)                   |             |            |        |        |      |        |            |
| 18       | 115.0, CH             | 6.63, d (8.0)                   |             |            |        |        |      |        |            |
| 19       | 156.3, C              |                                 |             |            |        |        |      |        |            |
| 20       | 115.0, CH             | 6.63, d (8.0)                   |             |            |        |        |      |        |            |
| 21       | 130.0, CH             | 7.04, d (8.0)                   |             |            |        |        |      |        |            |
| 22-NH    |                       | 7.86, br s                      | 14, 15      | 24, 25     | 14, 24 | 24     | 23   | 13     |            |
| 23       | 169.4, C              |                                 |             |            |        |        |      |        |            |
| 24       | 54.1, CH              | 4.04, m                         |             |            |        |        |      |        | 25         |
| 25       | 60.8, CH <sub>2</sub> | 3.54, m<br>3.98, m              |             |            |        |        |      |        | 24         |

|                    |                       |                                  |                |        |        |    |    |                |
|--------------------|-----------------------|----------------------------------|----------------|--------|--------|----|----|----------------|
| 26-NH              |                       | 9.28, br s                       | 24             | 28, 29 | 24     | 28 | 27 |                |
| 27                 | 168.8, C              |                                  |                |        |        |    |    |                |
| 28                 | 55.3, CH              | 4.37, m                          |                |        |        |    |    | 29             |
| 29                 | 74.8, CH              | 3.54, m                          |                |        |        |    |    | 28, 30, 31, 32 |
| 30                 | 27.8, CH              | 1.64, m                          |                |        |        |    |    | 31, 32         |
| 31                 | 14.1, CH <sub>3</sub> | 0.53, br s                       |                |        |        |    |    | 30, 32         |
| 32                 | 19.1, CH <sub>3</sub> | 0.17, br s                       |                |        |        |    |    | 30, 31         |
| 33-NH              |                       | 6.85, br s                       | 28, 29         | 35, 36 | 28     | 35 | 34 | 27             |
| 34                 | 171.7, C              |                                  |                |        |        |    |    |                |
| 35                 | 53.71, CH             | 4.01, m                          |                |        |        |    |    | 36             |
| 36                 | 29.4, CH <sub>2</sub> | 1.83, m                          |                |        |        |    |    | 35, 37, 38, 39 |
| 37                 | 23.5, CH <sub>2</sub> | 1.26, m<br>1.34, m               |                |        |        |    |    | 35, 36, 38, 39 |
| 38                 | 27.5, CH <sub>2</sub> | 1.46, m                          |                |        |        |    |    |                |
| 39                 | 38.8, CH <sub>2</sub> | 2.68, t (7.5)                    |                |        |        |    |    |                |
| 40-NH <sub>2</sub> |                       |                                  |                |        |        |    |    |                |
| 41-NH              |                       | 7.41, br s                       |                | 43, 44 | 35     | 43 | 42 |                |
| 42                 | 171.3, C              |                                  |                |        |        |    |    |                |
| 43                 | 57.0, CH              | 3.92, m                          |                |        |        |    |    | 44             |
| 44                 | 34.4, CH <sub>2</sub> | 2.80, d (12.5)<br>3.01, d (12.5) |                |        |        |    |    |                |
| 45                 | 127.8, C              |                                  |                |        |        |    |    |                |
| 46                 | 129.8, CH             | 7.07, d (7.5)                    |                |        |        |    |    |                |
| 47                 | 115.0, CH             | 6.69, d (7.5)                    |                |        |        |    |    |                |
| 48                 | 156.3, C              |                                  |                |        |        |    |    |                |
| 49                 | 115.0, CH             | 6.69, d (7.5)                    |                |        |        |    |    |                |
| 50                 | 129.8, CH             | 7.07, d (7.5)                    |                |        |        |    |    |                |
| 51-NH              |                       | 9.13, br s                       | 43, 44; 53, 54 | 53, 54 | 43, 53 | 53 | 52 | 42             |
| 52                 | 175.5, C              |                                  |                |        |        |    |    |                |
| 53                 | 53.1, CH              | 4.18, m                          |                |        |        |    |    | 54, 55, 56, 57 |
| 54                 | 38.9, CH <sub>2</sub> | 1.57, m                          |                |        |        |    |    |                |

|       |                       |                |                |        |        |    |    |    |
|-------|-----------------------|----------------|----------------|--------|--------|----|----|----|
|       |                       | 1.80, m        |                |        |        |    |    |    |
| 55    | 24.1, CH              | 1.41, m        |                |        |        |    |    |    |
| 56    | 22.5, CH <sub>3</sub> | 0.93, d (6.5)  |                |        |        |    |    |    |
| 57    | 22.4, CH <sub>3</sub> | 0.80, d (7.5)  |                |        |        |    |    |    |
| 58-NH |                       | 7.95, br s     | 53, 54; 60, 61 | 60, 61 | 53, 60 | 60 | 59 | 52 |
| 59    | 173.6, C              |                |                |        |        |    |    |    |
| 60    | 50.2, CH              | 5.18, m        |                |        |        |    |    |    |
| 61    | 35.2, CH <sub>2</sub> | 2.41, m        |                |        |        |    |    |    |
|       |                       | 3.25, m        |                |        |        |    |    |    |
| 62    | 138.0, C              |                |                |        |        |    |    |    |
| 63    | 128.4, CH             | 6.94, m        |                |        |        |    |    |    |
| 64    | 127.8, CH             | 7.16, m        |                |        |        |    |    |    |
| 65    | 126.2, CH             | 7.15, m        |                |        |        |    |    |    |
| 66    | 127.8, CH             | 7.16, m        |                |        |        |    |    |    |
| 67    | 128.4, CH             | 6.94, m        |                |        |        |    |    |    |
| 68-NH |                       | 8.50, d (6.5)  | 60, 61         | 70, 71 | 60, 70 | 70 | 69 | 59 |
| 69    | 168.8, C              |                |                |        |        |    |    |    |
| 70    | 61.0, CH              | 4.09, m        |                |        |        |    |    |    |
| 71    | 68.5, CH              | 4.53, m        |                |        |        |    |    |    |
| 72    | 12.4, CH <sub>3</sub> | 0.23, br s     |                |        |        |    |    |    |
| 73-NH |                       | 8.36, br s     | 70, 71         |        | 70     |    | 74 |    |
| 74    | 169.1, C              |                |                |        |        |    |    |    |
| 75    | 121.6, CH             | 7.04, d (15.5) |                |        |        |    |    |    |
| 76    | 137.6, CH             | 7.75, d (15.5) |                |        |        |    |    |    |
| 77    | 133.7, C              |                |                |        |        |    |    |    |
| 78    | 136.9, C              |                |                |        |        |    |    |    |
| 79    | 129.3, CH             | 7.16, m        |                |        |        |    |    |    |
| 80    | 130.5, CH             | 7.14, m        |                |        |        |    |    |    |
| 81    | 128.4, CH             | 6.93, m        |                |        |        |    |    |    |
| 82    | 126.2, CH             | 7.60, d (7.5)  |                |        |        |    |    |    |
| 83    | 19.1, CH <sub>3</sub> | 2.19, s        |                |        |        |    |    |    |

**Table S3.  $^1\text{H}$  and  $^{13}\text{C}$  NMR data for 1. (500 MHz for  $^1\text{H}$ , 125 MHz for  $^{13}\text{C}$ , DMSO- $d_6$ ).**

| Position           | $\delta_{\text{C}}$ , mult. | $\delta_{\text{H}}$ ( $J$ in Hz) | COSY                       | HMBC             | ROESY          |
|--------------------|-----------------------------|----------------------------------|----------------------------|------------------|----------------|
| 1                  | 171.4, C                    |                                  |                            |                  |                |
| 2                  | 49.9, CH                    | 4.26, m                          | 3                          | 1                | 6, 7           |
| 3                  | 38.9, CH <sub>2</sub>       | 1.46, m                          | 2                          | 2, 4, 5, 6       | 5, 6           |
| 4                  | 24.2, CH                    | 1.55, m                          | 3, 5, 6                    | 2, 3, 5, 6       | 2              |
| 5                  | 23.0, CH <sub>3</sub>       | 0.83, d (6.5)                    | 4                          | 4, 6             | 2              |
| 6                  | 20.8, CH <sub>3</sub>       | 0.76, d (6.5)                    | 4                          | 3, 4, 5          | 2, 3           |
| 7-NH               |                             | 8.53, br s                       | 2                          |                  | 2, 9, 10, 11   |
| 8                  | 171.8, C                    |                                  |                            |                  |                |
| 9                  | 54.7, CH                    | 3.87, m                          | 10, 17                     | 10, 11, 18       | 17             |
| 10                 | 27.0, CH <sub>2</sub>       | 1.52, m                          |                            | 9, 11, 12a       |                |
| 11                 | 24.7, CH <sub>2</sub>       | 1.46, m<br>1.30, m               |                            |                  | 7, 9           |
| 12                 | 38.9, CH <sub>2</sub>       | 2.77, m<br>2.70, m               | 11<br>11                   | 11               |                |
| 13-NH              |                             | 9.69, br s                       | 12                         |                  | 9, 10, 11, 12  |
| 14                 | 157.8, C                    |                                  |                            |                  |                |
| 15-NH <sub>2</sub> |                             | 7.20, br s                       |                            |                  |                |
| 16-NH              |                             | 7.20, br s                       |                            |                  |                |
| 17-NH              |                             | 8.71, br s                       | 9                          |                  | 9, 10, 19, 21  |
| 18                 | 171.8, C                    |                                  |                            |                  |                |
| 19                 | 59.0, CH                    | 4.60, d (3.7)                    | 20                         | 18, 20, 21a, 22a | 17             |
| 20                 | 29.5, CH <sub>2</sub>       | 2.10, m                          | 19, 21                     | 19, 21, 22a      | 22a            |
| 21                 | 23.7, CH <sub>2</sub>       | 1.88, m<br>1.71, m               | 20, 21b, 22<br>20, 21a, 22 | 19, 20, 22a      | 19             |
| 22                 | 45.5, CH <sub>2</sub>       | 3.57, m<br>3.15, m               | 21, 22b<br>21, 22a         | 19               | 20, 24         |
| 23                 | 167.5, CH                   |                                  |                            | 24               |                |
| 24                 | 40.9, CH <sub>2</sub>       | 4.32, d (15.8)<br>3.68, d (15.8) | 24b, 25<br>24a, 25         |                  | 25             |
| 25-NH              |                             | 8.52, br s                       | 24                         | 26               | 24, 27         |
| 26                 | 171.8, C                    |                                  |                            |                  |                |
| 27                 | 52.1, CH                    | 3.90, m                          | 28, 32                     | 28, 29           | 25, 29, 32     |
| 28                 | 26.7, CH <sub>2</sub>       | 1.58, m                          | 27                         | 27               |                |
| 29                 | 31.1, CH <sub>2</sub>       | 1.58, m                          |                            | 31               | 27, 31, 32     |
| 30                 | 173.6, C                    |                                  |                            | 29, 31           |                |
| 31-NH <sub>2</sub> |                             | 6.60, s; 6.58, s                 |                            |                  | 29             |
| 32-NH              |                             | 7.18, br s                       | 27                         |                  | 27, 28, 29, 36 |
| 33                 | 171.4, C                    |                                  |                            |                  |                |
| 34                 | 48.4, CH                    | 4.14, m                          | 35, 36                     | 33, 35           | 32, 36         |



|       |                       |                |         |                    |                        |
|-------|-----------------------|----------------|---------|--------------------|------------------------|
| 35    | 16.4, CH <sub>3</sub> | 1.31, d (7.4)  | 34      | 33, 34             | 36                     |
| 36-NH |                       | 7.48, br s     | 34      |                    | 34, 38, 42             |
| 37    | 171.4, C              |                |         |                    |                        |
| 38    | 61.0, CH              | 3.77, br s     | 39, 42  | 37, 39, 40, 41, 43 | 32, 36, 40, 41, 42     |
| 39    | 28.4, CH              | 2.14, m        | 38      | 37, 38, 40, 41     | 42                     |
| 40    | 19.0, CH <sub>3</sub> | 1.00, d (6.8)  | 39      | 38, 39, 41         | 38, 42                 |
| 41    | 17.8, CH <sub>3</sub> | 0.99, d (6.8)  | 39      | 40                 | 38, 42                 |
| 42-NH |                       | 9.07, br s     | 38      |                    | 36, 38, 39, 40, 41, 44 |
| 43    | 176.2, C              |                |         |                    |                        |
| 44    | 52.7, CH              | 4.30, m        | 45, 49  | 43, 49             | 44, 45, 46, 47, 48, 49 |
| 45    | 39.0, CH <sub>2</sub> | 1.97, m        | 44, 45b | 46, 47, 48         | 47, 48, 49, 67         |
|       |                       | 1.65, m        | 45a     |                    |                        |
| 46    | 23.0, CH              | 1.72, m        | 47, 48  | 47, 48             | 49, 67                 |
| 47    | 22.7, CH <sub>3</sub> | 1.00, d (6.8)  |         | 48                 | 44, 45                 |
| 48    | 22.2, CH <sub>3</sub> | 0.92, d (6.4)  |         | 47                 | 44, 45                 |
| 49-NH |                       | 8.13, br s     | 44      | 50                 | 44, 45, 46, 59         |
| 50    | 173.0, C              |                |         |                    |                        |
| 51    | 51.8, CH              | 5.00, br s     | 52      | 52                 | 44, 49, 54, 58, 59,    |
| 52    | 34.8, CH <sub>2</sub> | 3.28, d (10)   | 51, 52b | 58                 | 54, 58                 |
|       |                       | 2.39, d (10)   | 51, 52a |                    |                        |
| 53    | 138.3, C              |                |         | 52a, 55            |                        |
| 54    | 128.8, CH             | 7.04, d (7.4)  |         | 52a, 58            | 51, 52b, 63            |
| 55    | 128.0, CH             | 7.24, t (7.4)  |         |                    | 63                     |
| 56    | 126.1, CH             | 7.15, t (7.4)  | 19      | 54, 56             |                        |
| 57    | 128.0, CH             | 7.24, t (7.4)  | 58      | 55                 | 63                     |
| 58    | 128.8, CH             | 7.04, d (7.4)  | 57      | 56, 58             | 51, 52b, 63            |
| 59-NH |                       | 8.40, d (8.9)  | 51      | 60                 | 49, 52b, 61, 63, 64    |
| 60    | 168.6, C              |                |         |                    |                        |
| 61    | 59.3, CH              | 4.18, m        | 62, 64  | 63                 | 49, 59, 63, 64         |
| 62    | 68.5, CH              | 4.87, m        | 61, 63  | 1, 63              | 59, 64                 |
| 63    | 12.1, CH <sub>3</sub> | 0.48, d (5.3)  | 62      | 62                 | 2, 56, 58, 59, 62, 63  |
| 64-NH |                       | 8.98, br s     | 61      |                    | 59, 61, 63, 66         |
| 65    | 169.5, C              |                |         |                    |                        |
| 66    | 121.7, CH             | 6.37, d (15.5) | 67      | 65, 67             | 64, 73, 74             |
| 67    | 136.2, CH             | 7.69, d (15.5) | 66      | 65                 | 70, 71                 |
| 68    | 133.5, C              |                |         | 66, 67, 73, 74     |                        |
| 69    | 136.6, C              |                |         | 67, 70, 72, 74     |                        |
| 70    | 130.2, CH             | 7.14, m        |         | 67                 | 66, 74                 |
| 71    | 130.2, CH             | 7.14, m        | 73, 74  | 73, 74             | 74                     |
| 72    | 128.9, CH             | 7.18, m        |         | 70                 | 74                     |
| 73    | 126.5, CH             | 7.75, d (7.4)  | 71, 74  | 71, 74             | 66, 70, 71             |
| 74    | 19.2, CH <sub>3</sub> | 2.30, s        | 71, 73  | 73                 | 67, 72                 |

**Table S4. <sup>1</sup>H and <sup>13</sup>C NMR data for 2. (500 MHz for <sup>1</sup>H, 125 MHz for <sup>13</sup>C, DMSO-*d*<sub>6</sub>).**

| Position | $\delta_C$ , mult.    | $\delta_H$ ( <i>J</i> in Hz)    | COSY       | HMBC       | ROESY              |
|----------|-----------------------|---------------------------------|------------|------------|--------------------|
| 1        | 168.8, C              |                                 |            |            |                    |
| 2        | 56.4, CH              | 4.03, m                         | 3          |            | 3, 4, 5, 6, 81     |
| 3        | 74.8, CH              | 3.29, m                         | 3, 4       | 4, 5, 6    | 2, 4, 5, 6, 7      |
| 4        | 29.5, CH              | 1.77, m                         | 3, 4, 5    | 3, 5, 6    | 2, 3, 5, 6, 7      |
| 5        | 19.1, CH <sub>3</sub> | 0.86, d (7.0)                   | 4          | 3, 4, 6    | 2, 3, 4            |
| 6        | 16.7, CH <sub>3</sub> | 0.78, d (7.0)                   | 4          | 3, 4, 5    | 2, 3, 4            |
| 7-NH     |                       | 8.10, d (6.0)                   | 2          | 8          | 2, 3, 4, 6, 9      |
| 8        | 170.3, C              |                                 |            |            |                    |
| 9        | 59.9, CH              | 3.74, m                         | 10, 12     |            | 7, 11              |
| 10       | 65.6, CH              | 3.56, m                         | 9, 11      |            | 12                 |
| 11       | 20.6, CH <sub>3</sub> | 0.83, d (6.0)                   | 10         | 9, 10      | 9, 10, 12          |
| 12-NH    |                       | 8.46, br s                      | 9          |            | 4, 9, 11, 14       |
| 13       | 172.8, C              |                                 |            |            |                    |
| 14       | 55.5, CH              | 4.34, m                         | 15         | 15         | 12, 15, 22         |
| 15       | 37.0, CH <sub>2</sub> | 2.83, d (12.5)<br>2.92 d (12.5) | 14         | 13, 14     | 14, 17             |
| 16       | 127.1, C              |                                 |            |            |                    |
| 17       | 130.0, CH             | 7.04, d (8.0)                   | 18         | 18, 19, 21 | 14                 |
| 18       | 115.0, CH             | 6.63, d (8.0)                   | 17         | 16, 19, 20 |                    |
| 19       | 156.3, C              |                                 |            |            |                    |
| 20       | 115.0, CH             | 6.63, d (8.0)                   | 21         | 16, 18, 19 | 11                 |
| 21       | 130.0, CH             | 7.04, d (8.0)                   | 20         | 17, 19, 20 | 14                 |
| 22-NH    |                       | 7.69, br s                      | 14         |            | 14, 24, 26         |
| 23       | 169.4, C              |                                 |            |            |                    |
| 24       | 54.1, CH              | 4.04, m                         | 25, 26     | 23, 25     | 25b                |
| 25       | 60.8, CH <sub>2</sub> | 3.54, m<br>3.98, m              | 24         | 23         | 24                 |
| 26-NH    |                       | 8.90, br s                      | 23         |            | 28                 |
| 27       | 171.7, C              |                                 |            |            |                    |
| 28       | 55.3, CH              | 4.37, m                         | 29, 33     | 29, 34     | 26, 29, 31         |
| 29       | 74.8, CH              | 3.54, m                         | 28         |            | 25b, 30, 32, 33    |
| 30       | 27.8, CH              | 1.64, m                         | 29, 31, 32 | 32         | 25, 28, 31, 32, 33 |
| 31       | 14.1, CH <sub>3</sub> | 0.53, br s                      | 30         |            | 28, 30, 32         |
| 32       | 19.1, CH <sub>3</sub> | 0.17, br s                      | 30         |            | 29, 30             |
| 33-NH    |                       | 6.88, br s                      | 28         |            | 29, 30             |
| 34       | 171.7, C              |                                 |            |            |                    |
| 35       | 53.71, CH             | 4.01, m                         | 35, 36     |            | 29, 37             |
| 36       | 29.4, CH <sub>2</sub> | 1.83, m                         | 35, 37     |            | 35                 |
| 37       | 23.5, CH <sub>2</sub> | 1.26, m                         |            | 37         | 39                 |

|                    |                       |                                  |         |                    |                        |
|--------------------|-----------------------|----------------------------------|---------|--------------------|------------------------|
|                    |                       | 1.34, m                          |         |                    |                        |
| 38                 | 27.5, CH <sub>2</sub> | 1.46, m                          | 39      |                    | 39                     |
| 39                 | 38.8, CH <sub>2</sub> | 2.68, t (7.5)                    | 38      |                    | 37, 38                 |
| 40-NH <sub>2</sub> |                       |                                  |         |                    |                        |
| 41-NH              |                       | 7.40, br s                       | 35      |                    |                        |
| 42                 | 171.3, C              |                                  |         |                    |                        |
| 43                 | 57.0, CH              | 3.92, m                          | 44      | 42                 |                        |
| 44                 | 34.4, CH <sub>2</sub> | 2.80, d (12.5)<br>3.01, d (12.5) |         | 47                 | 46/50                  |
| 45                 | 127.8, C              |                                  |         |                    |                        |
| 46                 | 129.8, CH             | 7.07, d (7.5)                    | 47      | 48                 | 43, 44, 51             |
| 47                 | 115.0, CH             | 6.69, d (7.5)                    | 46      | 45, 47, 48         |                        |
| 48                 | 156.3, C              |                                  |         |                    |                        |
| 49                 | 115.0, CH             | 6.69, d (7.5)                    | 50      | 45, 48, 49         | 56, 57                 |
| 50                 | 129.8, CH             | 7.07, d (7.5)                    | 49      | 48                 | 43, 44, 51, 56, 57     |
| 51-NH              |                       | 9.24, br s                       | 43      |                    | 46/50, 53              |
| 52                 | 175.5, C              |                                  |         |                    |                        |
| 53                 | 53.1, CH              | 4.18, m                          | 54, 58  | 52, 54             | 51, 54, 55, 56, 57, 58 |
| 54                 | 38.9, CH <sub>2</sub> | 1.57, m<br>1.80, m               | 55      |                    | 53, 58                 |
| 55                 | 24.1, CH              | 1.41, m                          | 56, 57  | 54, 56             | 53, 56, 57, 58         |
| 56                 | 22.5, CH <sub>3</sub> | 0.93, d (6.5)                    | 55      | 54, 55             | 52, 54, 55             |
| 57                 | 22.4, CH <sub>3</sub> | 0.80, d (7.5)                    | 55      | 55                 | 52, 54, 55             |
| 58-NH              |                       | 7.96, br s                       | 53      |                    | 53, 54, 56, 57, 58     |
| 59                 | 173.6, C              |                                  |         |                    |                        |
| 60                 | 50.2, CH              | 5.18, m                          | 61a, 68 |                    | 58, 63/67              |
| 61                 | 35.2, CH <sub>2</sub> | 2.41, m<br>3.25, m               |         |                    | 63/67                  |
| 62                 | 138.0, C              |                                  |         |                    |                        |
| 63                 | 128.4, CH             | 6.94, m                          | 64      |                    | 61b, 70                |
| 64                 | 127.8, CH             | 7.16, m                          | 63      | 62                 |                        |
| 65                 | 126.2, CH             | 7.15, m                          | 63      | 63                 |                        |
| 66                 | 127.8, CH             | 7.16, m                          | 67      | 62                 |                        |
| 67                 | 128.4, CH             | 6.94, m                          | 66      |                    |                        |
| 68-NH              |                       | 8.50, d (6.5)                    | 60      |                    | 58, 61b                |
| 69                 | 168.8, C              |                                  |         |                    |                        |
| 70                 | 61.0, CH              | 4.09, m                          |         |                    | 71, 72, 73             |
| 71                 | 68.5, CH              | 4.53, m                          | 72      |                    | 70, 72                 |
| 72                 | 12.4, CH <sub>3</sub> | 0.23, br s                       | 71      |                    | 2, 70, 71, 73          |
| 73-NH              |                       | 8.40, br s                       | 70      | 69                 | 70, 72, 75             |
| 74                 | 169.1, C              |                                  |         |                    |                        |
| 75                 | 121.6, CH             | 7.04, d (15.5)                   | 76      |                    |                        |
| 76                 | 137.6, CH             | 7.75, d (15.5)                   | 75      | 74, 75, 77, 78, 82 | 4, 5, 6, 81            |

|    |                       |               |        |    |        |
|----|-----------------------|---------------|--------|----|--------|
| 77 | 133.7, C              |               |        |    |        |
| 78 | 136.9, C              |               |        |    |        |
| 79 | 129.3, CH             | 7.16, m       | 82     |    | 72     |
| 80 | 130.5, CH             | 7.14, m       | 81, 82 | 83 |        |
| 81 | 128.4, CH             | 6.93, m       | 82     |    |        |
| 82 | 126.2, CH             | 7.60, d (7.5) | 81     |    | 83     |
| 83 | 19.1, CH <sub>3</sub> | 2.19, s       |        | 77 | 80, 82 |

---

**Table S5.** Advanced Marfey's analysis of Eudistamide A (1).

| Amino acid | HPLC retention times; <sup>a</sup> L-FDLA derivative of acid hydrolysate |                      | HPLC retention times; <sup>a</sup> L-FDLA derivative of acid hydrolysate | Assignment     |
|------------|--------------------------------------------------------------------------|----------------------|--------------------------------------------------------------------------|----------------|
|            | L-standard                                                               | D-standard           |                                                                          |                |
| Arg        | 15.8                                                                     | 15.2                 | 15.8                                                                     | L              |
| Pro        | 17.1                                                                     | 17.5                 | 17.1                                                                     | L              |
| Glu        | 16.9                                                                     | 17.6                 | 17.6                                                                     | D              |
| Ala        | 17.1                                                                     | 18.2                 | 17.1                                                                     | L              |
| Leu        | 18.2                                                                     | 19.9                 | 19.9                                                                     | D              |
| Val        | 17.7                                                                     | 18.2                 | 17.7                                                                     | L              |
| Phe        | 18.0                                                                     | 19.5                 | 18.0                                                                     | L              |
| Thr        | 16.2                                                                     | 17.5                 | 16.7                                                                     | L- <i>allo</i> |
|            | 16.7 ( <i>allo</i> )                                                     | 17.0 ( <i>allo</i> ) |                                                                          |                |

<sup>a</sup>Measured by LC-MS selected ion chromatogram on a reversed-phase column (Phenomenex Kinetex C18, 100 x 4.6 mm, 2.6  $\mu$ m, 0.5 mL/min) with a linear gradient from 10% to 100% aqueous MeOH containing 0.1% formic acid over 15 min, and a hold at 100% MeOH for 5 min.

**Table S6.** Advanced Marfey's analysis of Eudistamide B (2).

| Amino acid | HPLC retention times (min) <sup>a</sup> ; L-FDLA derivative of acid hydrolysate |                              | HPLC retention times (min) <sup>a</sup> ; L-FDLA derivative of acid hydrolysate | Assignment    |
|------------|---------------------------------------------------------------------------------|------------------------------|---------------------------------------------------------------------------------|---------------|
|            | L-standard                                                                      | D-standard                   |                                                                                 |               |
| Thr        | 18.3<br>18.5 ( <i>allo</i> )                                                    | 20.4<br>19.7 ( <i>allo</i> ) | 19.7                                                                            | <i>D-allo</i> |
| Tyr        | 15.4                                                                            | 21.2                         | 21.2                                                                            | D             |
| Ser        | 18.5                                                                            | 18.9                         | 18.5                                                                            | L             |
| Lys        | 13.1                                                                            | 12.7                         | 12.7                                                                            | D             |
| Leu        | 22.8                                                                            | 26.5                         | 22.8                                                                            | L             |
| Phe        | 23.2                                                                            | 26.2                         | 26.2                                                                            | D             |

<sup>a</sup>Measured by LC-MS selected ion chromatogram on a reversed-phase column (Phenomenex Luna C<sub>18</sub>, 250 x 4.6 mm, 5 μm, 1.0 mL/min) with a linear gradient from 10% to 100% aqueous acetonitrile containing 0.1% formic acid over 30 min, and a hold at 100% acetonitrile for 5 min.

| Retention time (min) <sup>b</sup> | L-FDLA derivatives of 3-OH-Leu |               |               |               | L-FDLA derivative of acid hydrolysate | Assignment    |
|-----------------------------------|--------------------------------|---------------|---------------|---------------|---------------------------------------|---------------|
|                                   | <i>2S, 3R</i>                  | <i>2R, 3S</i> | <i>2S, 3S</i> | <i>2R, 3R</i> |                                       |               |
|                                   | 26.8                           | 38.6          | 27.5          | 35.4          | 26.8                                  | <i>2S, 3R</i> |

<sup>b</sup>Measured by LC-MS selected ion chromatogram on a reversed-phase column (Phenomenex Luna C<sub>18</sub>, 250 x 4.6 mm, 5 μm, 1.0 mL/min) with a linear gradient from 25% to 65% aqueous acetonitrile containing 0.1% formic acid over 50 min.

## Media study of strain WMMB 705.

### Recipes for different media

| Media components                 | M1      | M2      | M3      | M4      | M5      | M6      | M7      | M8                             | M9                             |
|----------------------------------|---------|---------|---------|---------|---------|---------|---------|--------------------------------|--------------------------------|
| Soluble Starch                   | 0.5 g                          | 0.5 g                          |
| Glucose                          | 0.25 g  | 0       | 0.25 g <sup>13</sup> C-Glucose | 0.25 g <sup>13</sup> C-Glucose |
| CaCO <sub>3</sub>                | 0.125 g                        | 0.125 g                        |
| Peptone                          | 0.125 g | 0       | 0.063 g | 0       | 0       | 0.125 g | 0.125 g | 0.125 g                        | 0.063 g                        |
| Yeast Extract                    | 0.125 g | 0       | 0.063 g | 0       | 0.125 g | 0       | 0.125 g | 0.125 g                        | 0.063 g                        |
| <sup>15</sup> NH <sub>4</sub> Cl | 0       | 0       | 0.125 g | 0.25    | 0.125 g | 0.125 g | 0       | 0                              | 0.125 g                        |
| ASW                              | 25 ml                          | 25 ml                          |

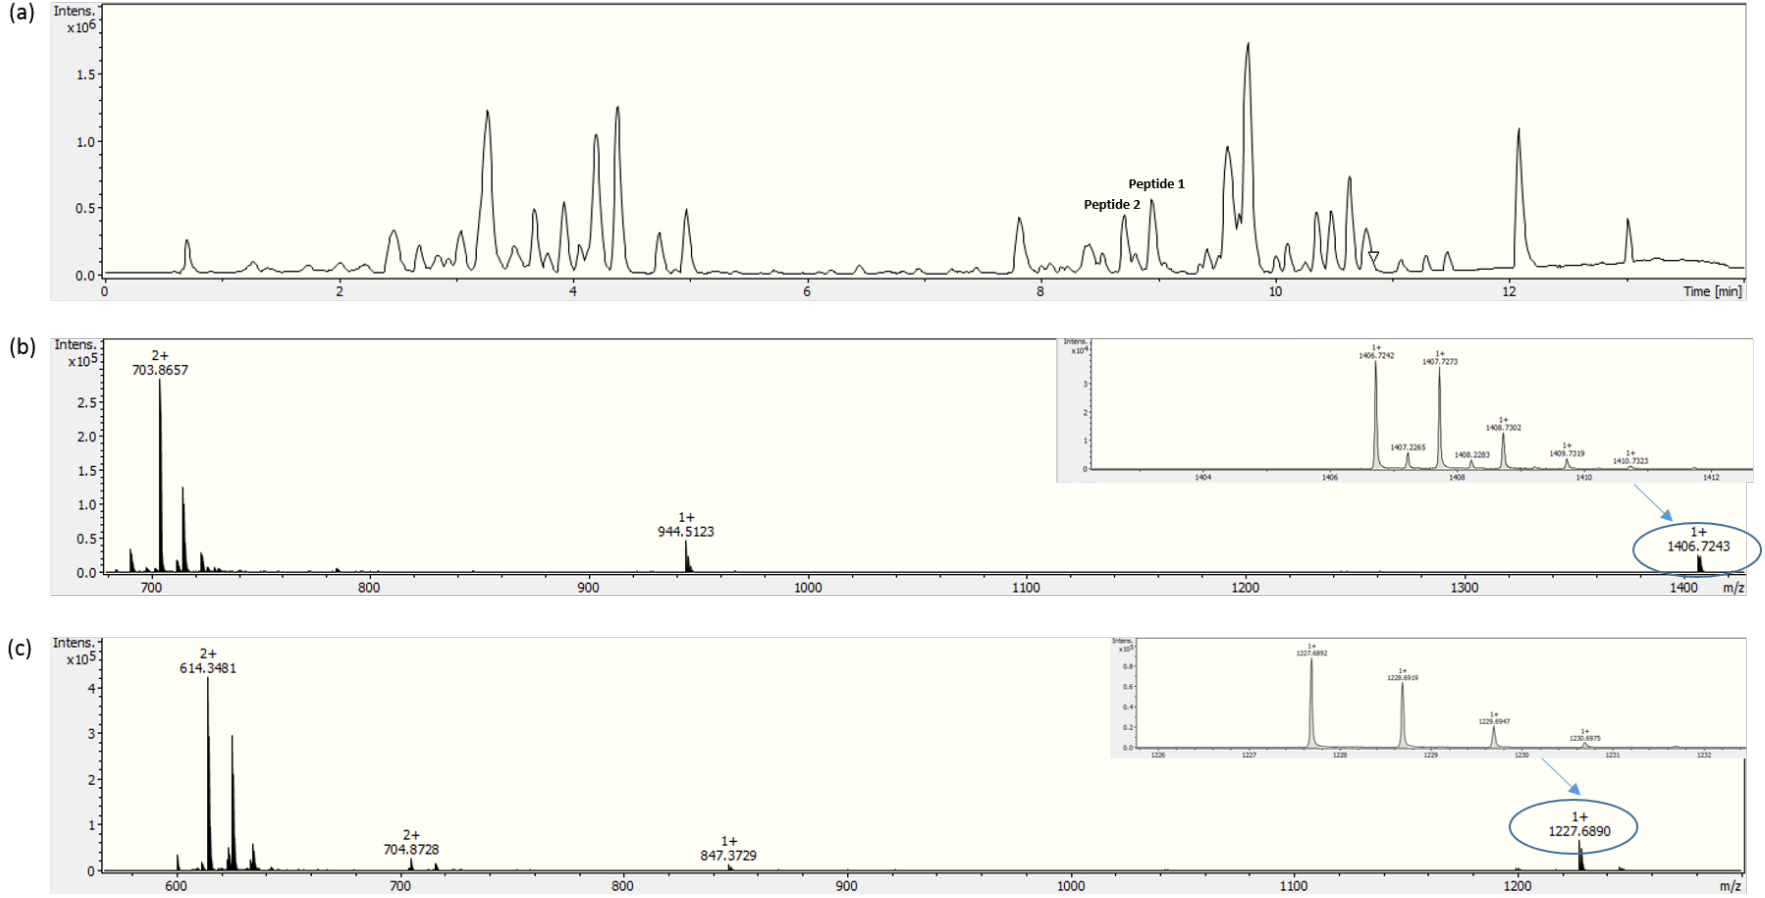

Fig 1 (a) LCMS data of crude extract of M1. (b) ESIMS of peptide 2 in M1. (b) ESIMS of peptide 1 in M1.



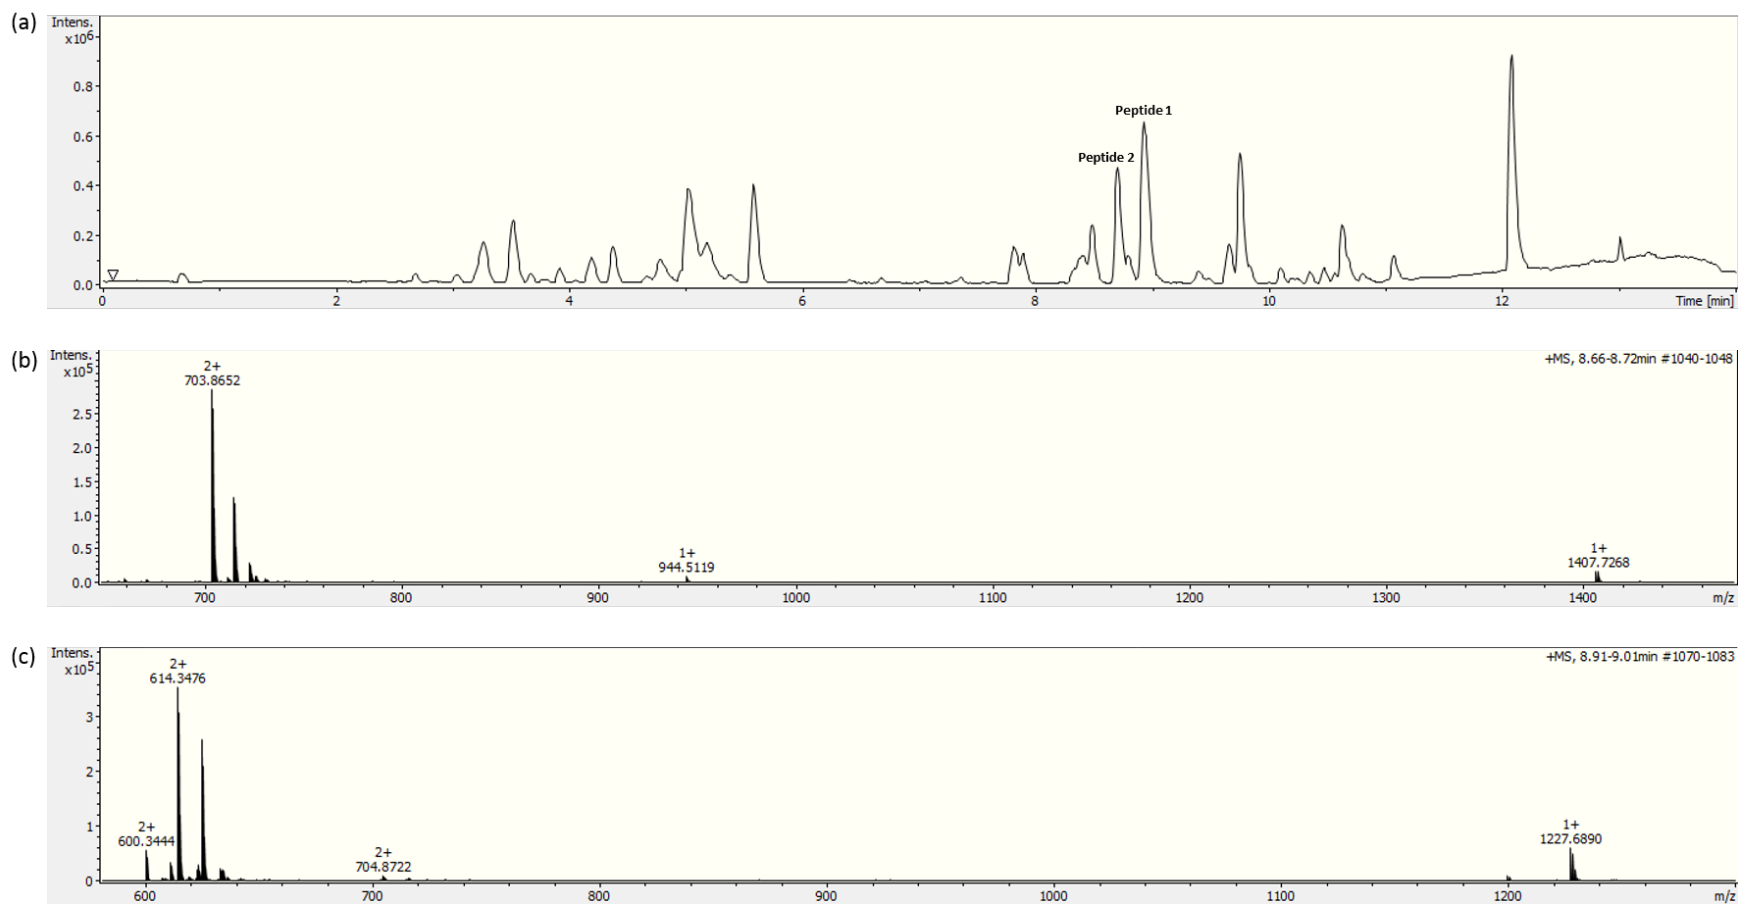

Fig 2 (a) LCMS data of crude extract of M2. (b) ESIMS of peptide 2 in M2. (b) ESIMS of peptide 1 in M2.

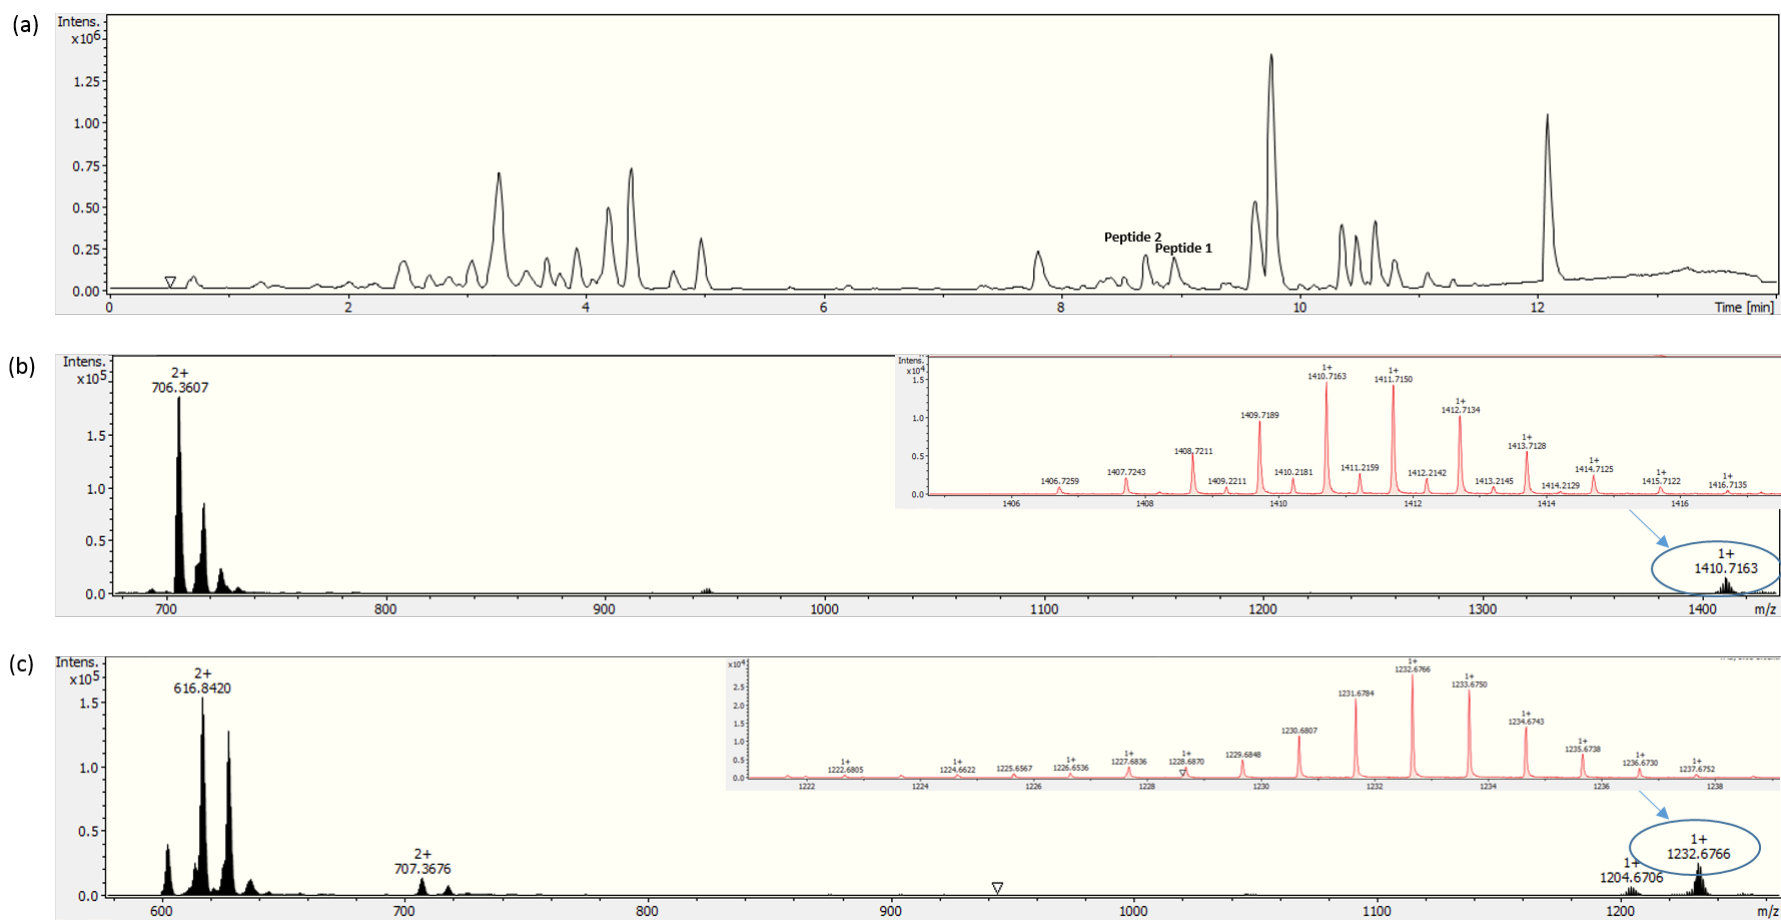

Fig 3 (a) LCMS data of crude extract of M3. (b) ESIMS of peptide 2 in M3. (c) ESIMS of peptide 1 in M3.

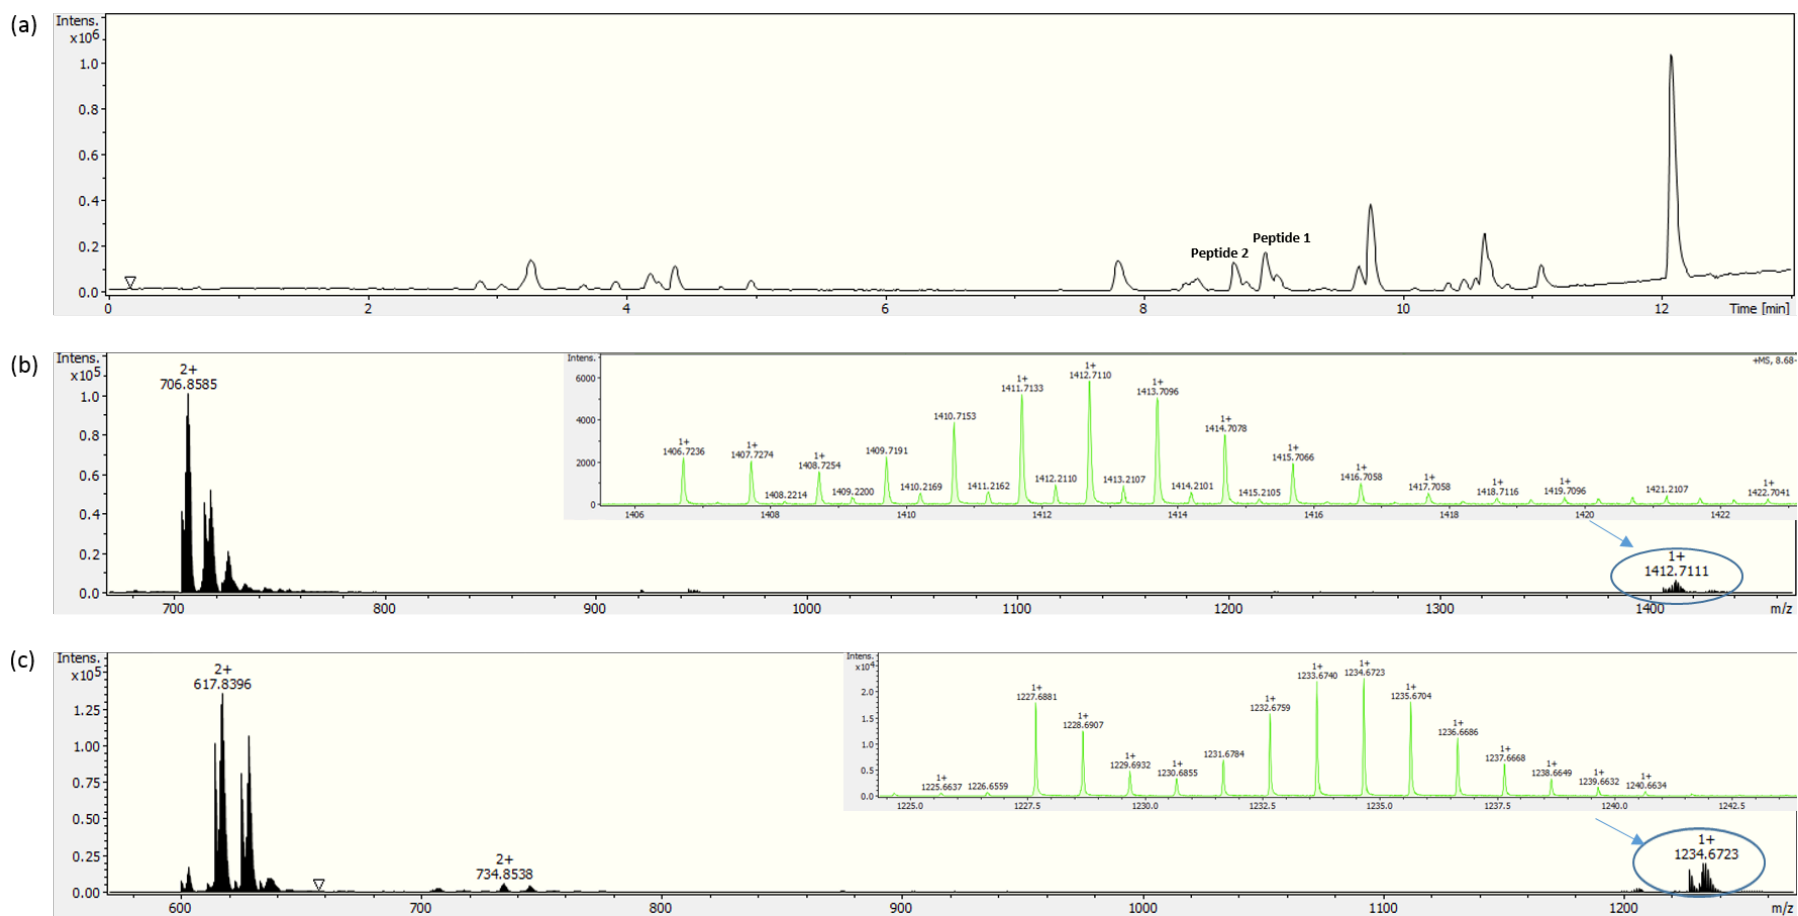

Fig 4 (a) LCMS data of crude extract of M4. (b) ESIMS of peptide 2 in M4. (c) ESIMS of peptide 1 in M4.

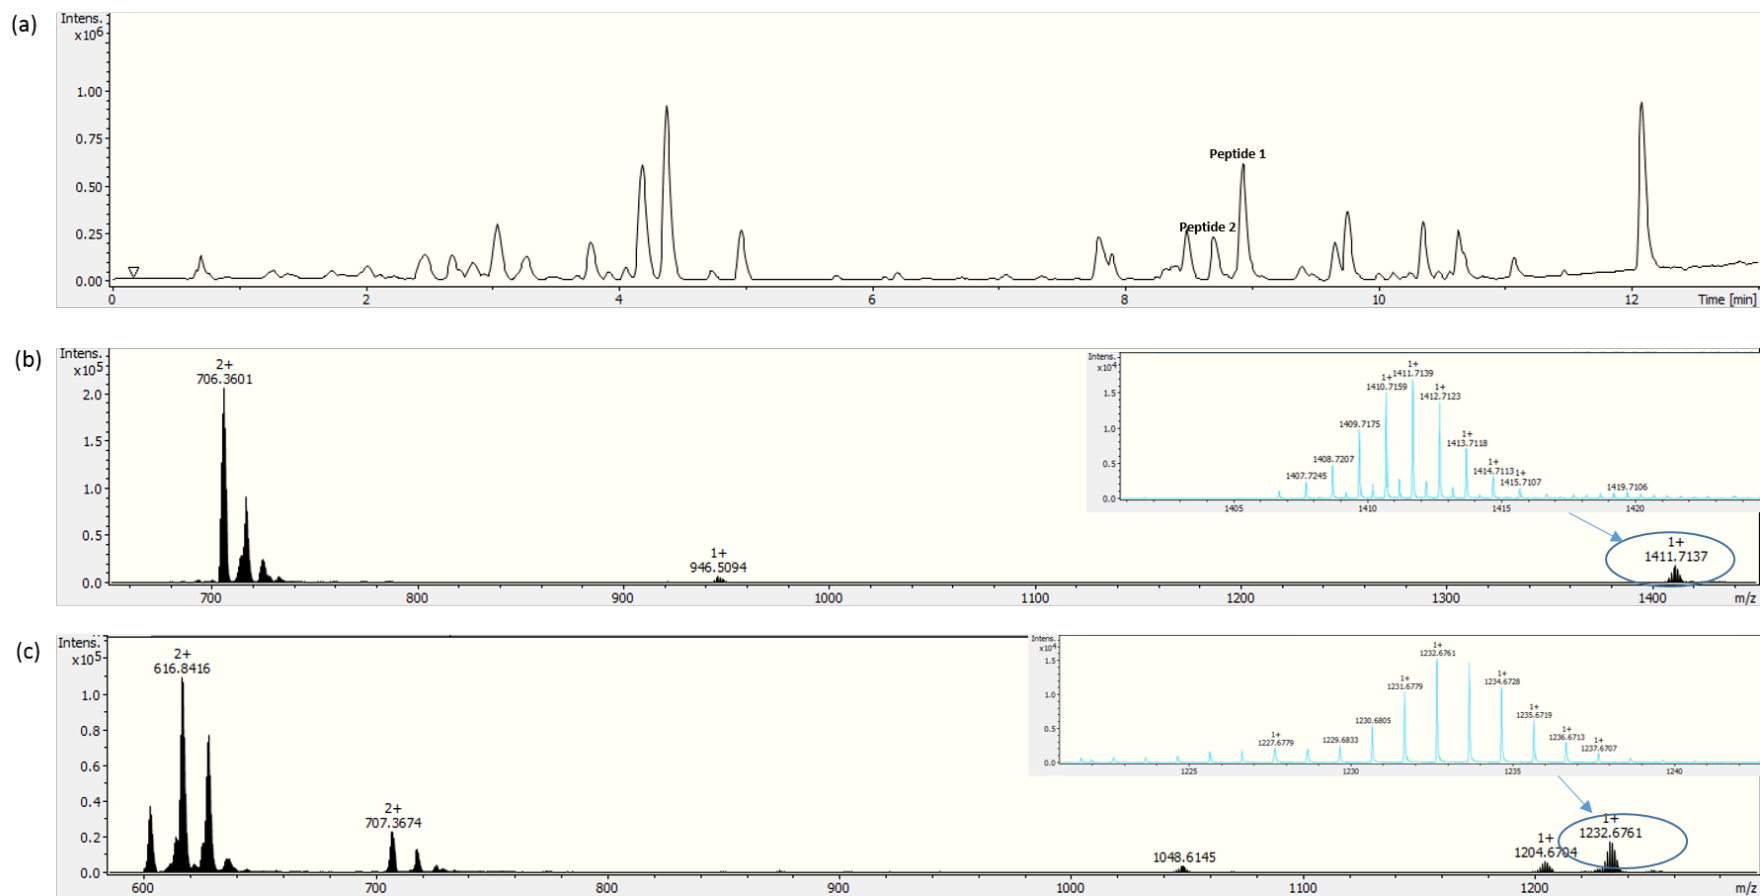

Fig 5 (a) LCMS data of crude extract of M5. (b) ESIMS of peptide 2 in M5. (c) ESIMS of peptide 1 in M5.

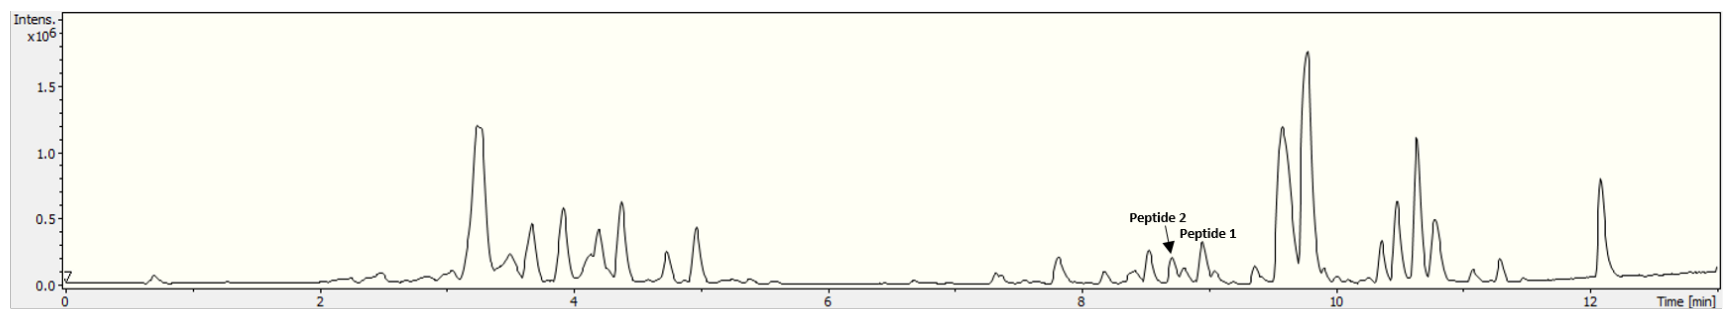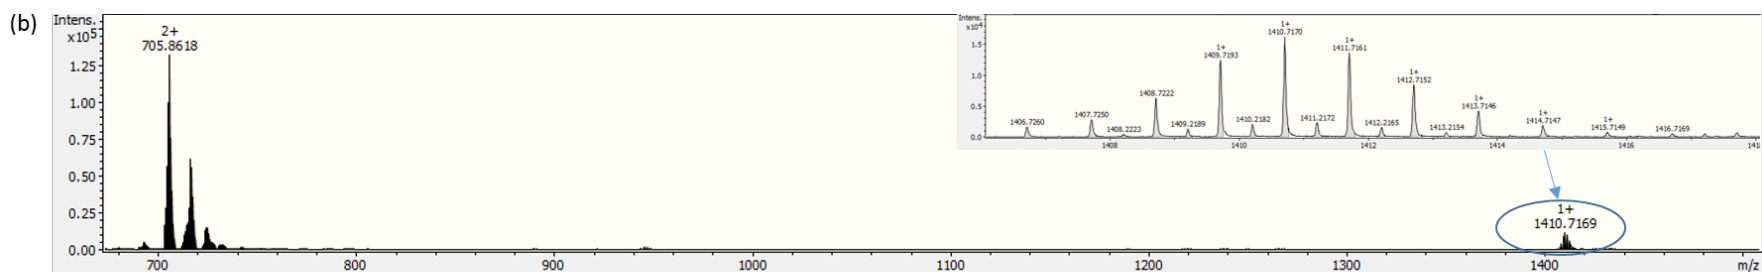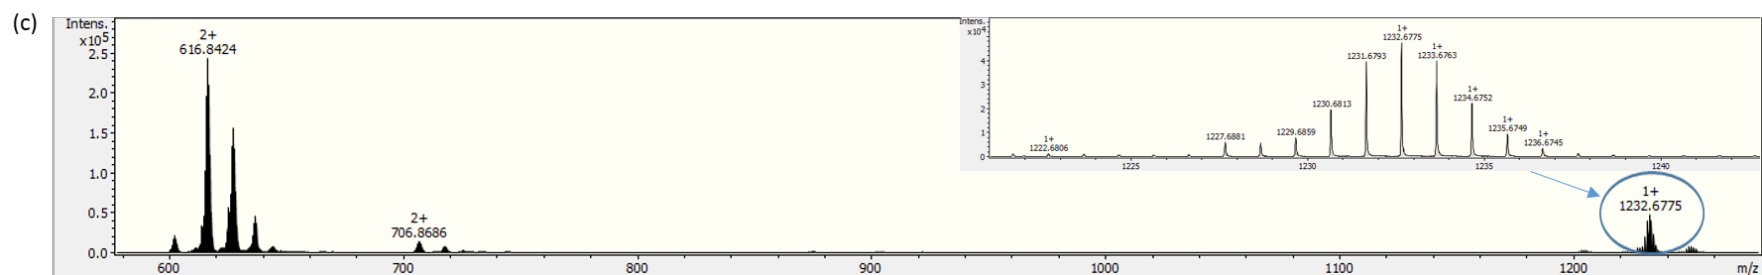

Fig 6 (a) LCMS data of crude extract of M6. (b) ESIMS of peptide 2 in M6. (c) ESIMS of peptide 1 in M6.

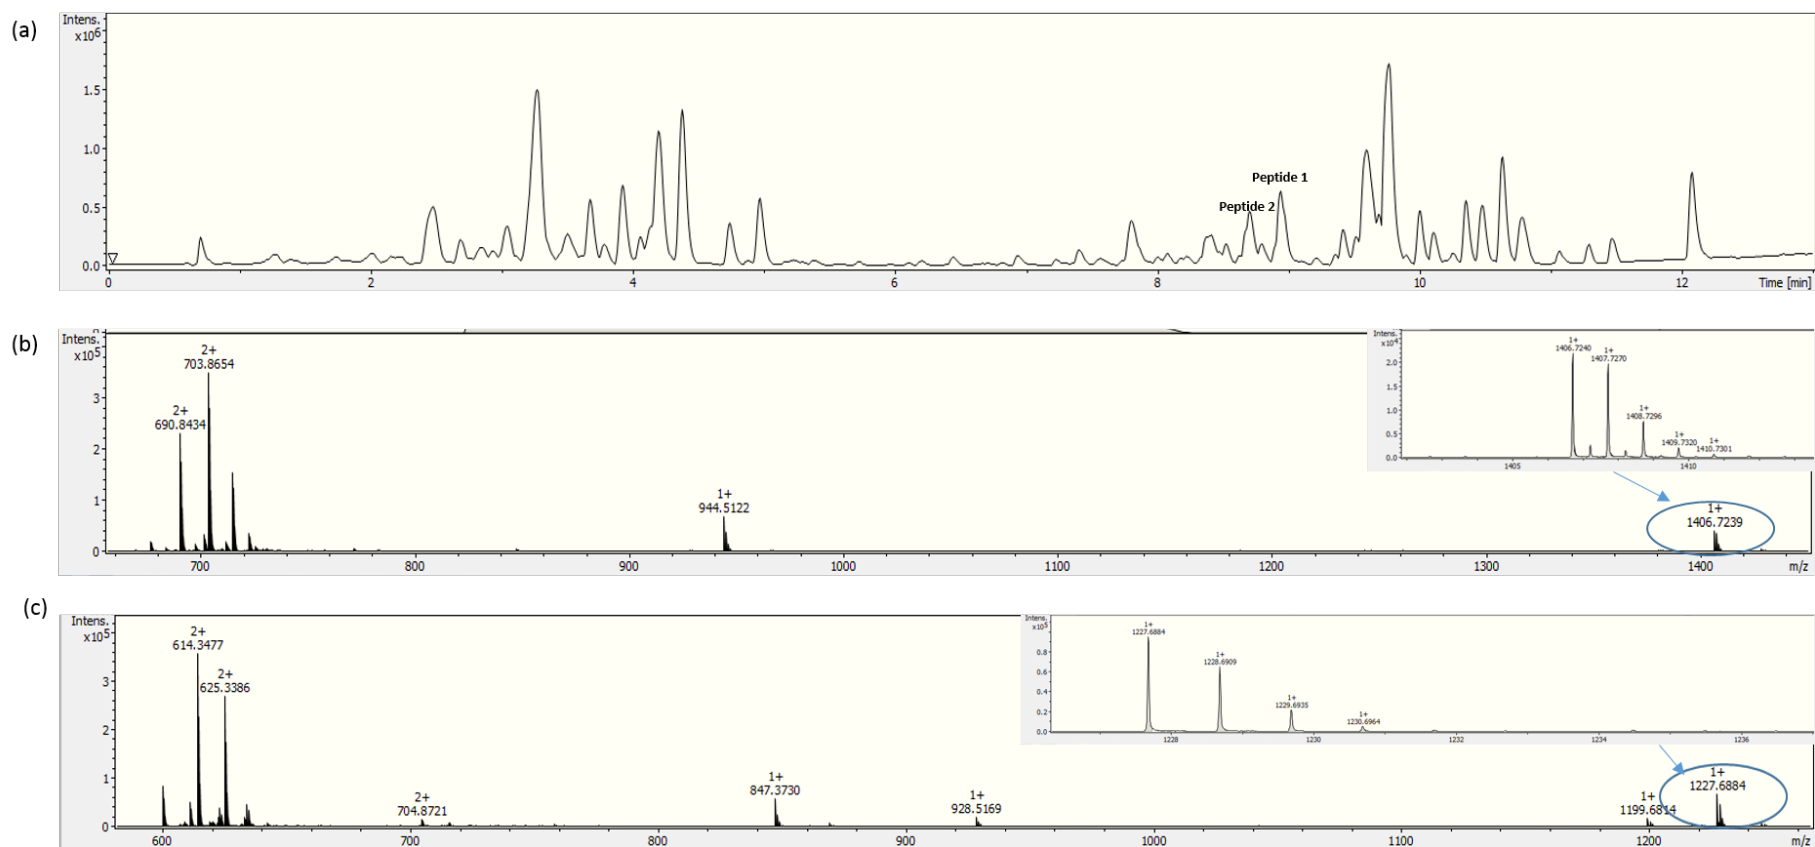

Fig 7 (a) LCMS data of crude extract of M7. (b) ESIMS of peptide 2 in M7. (b) ESIMS of peptide 1 in M7.

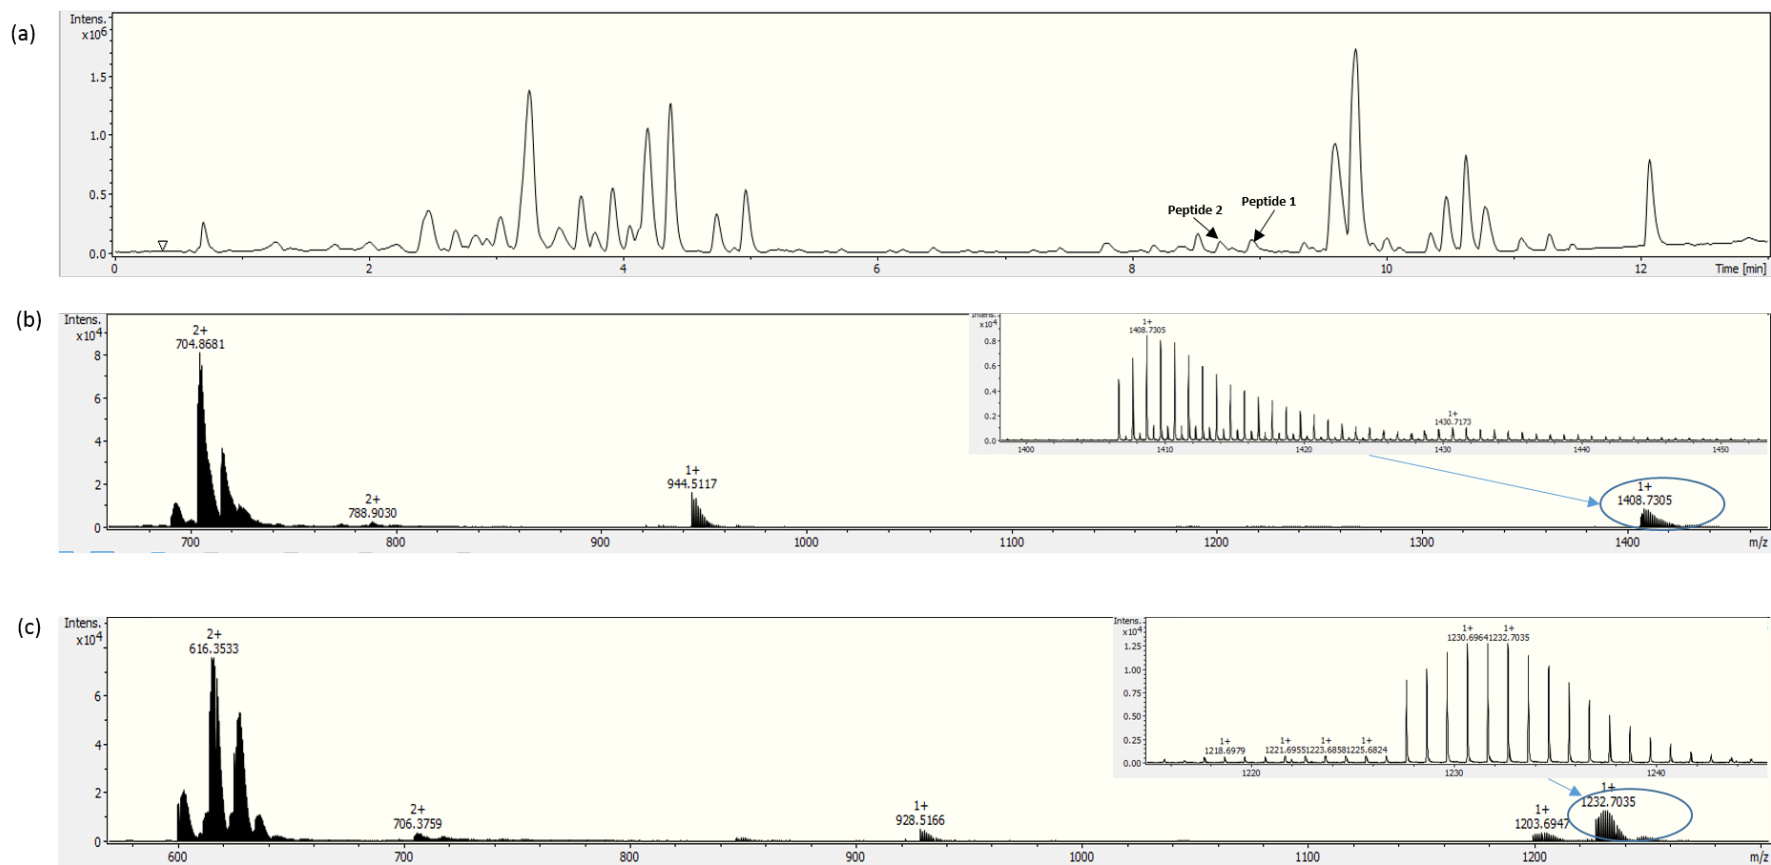

Fig 8 (a) LCMS data of crude extract of M8. (b) ESIMS of peptide 2 in M8. (c) ESIMS of peptide 1 in M8.

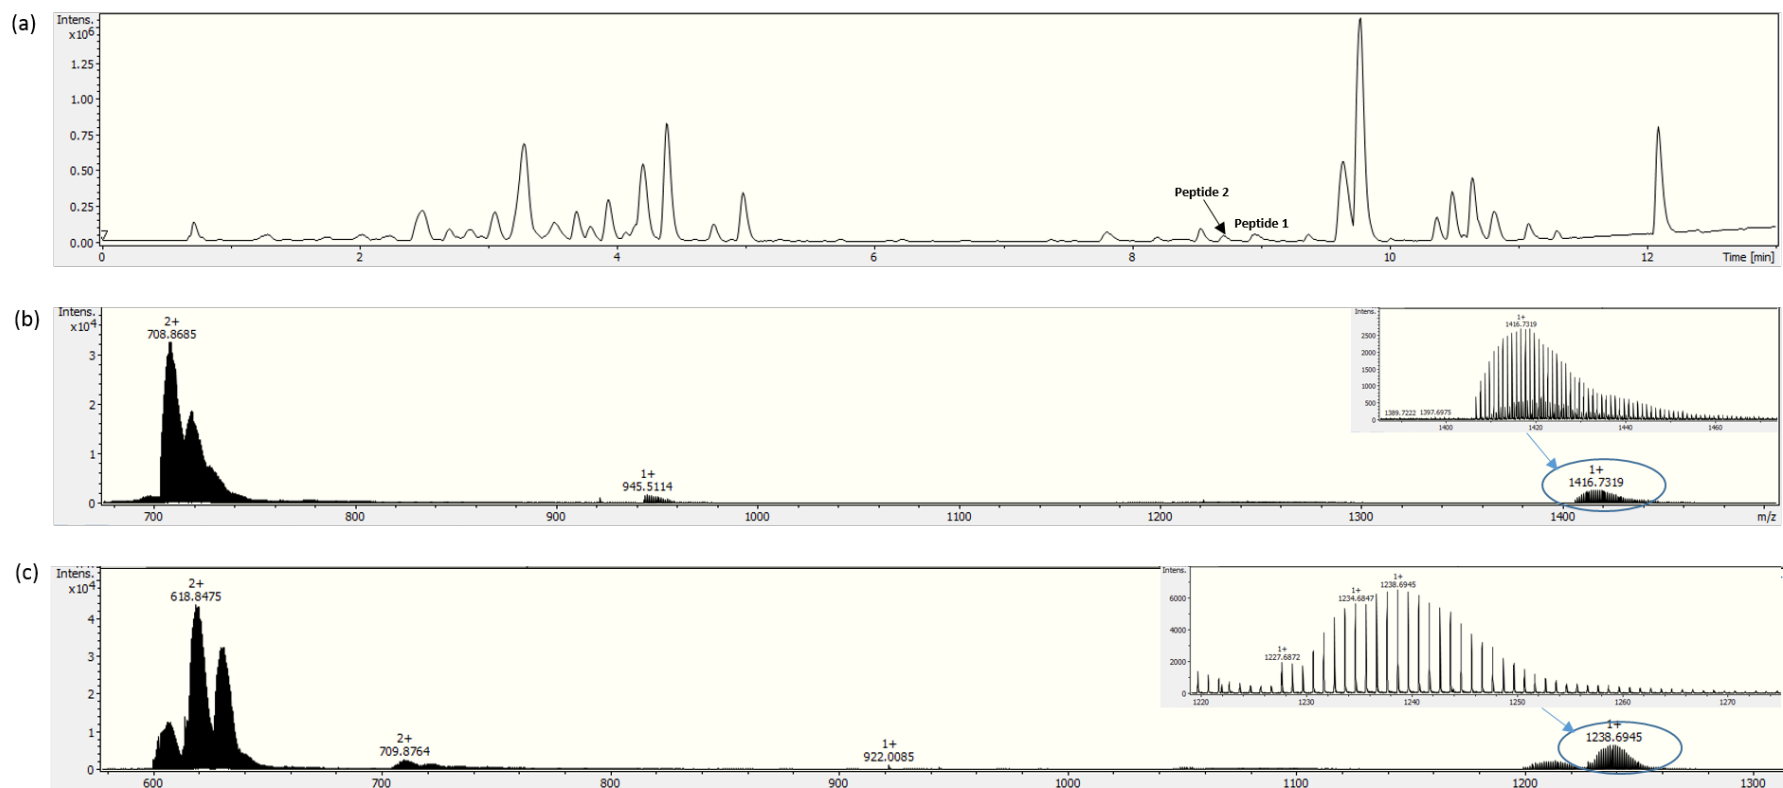

Fig 9 (a) LCMS data of crude extract of M9. (b) ESIMS of peptide 2 in M9. (c) ESIMS of peptide 1 in M9.
